# Supplementary material
Source: PubMed Central journal article supplement (PMC2859177)
Supplement: NIHMS191217-supplement-1_si_001.pdf [file NIHMS191217-supplement-1_si_001.pdf]

## Supporting Information

*N*-((1-Benzyl-1*H*-1,2,3-triazol-4-yl)methyl)arylamide as a New Scaffold that Provides Rapid Access to Antimicrotubule Agents: Synthesis and Evaluation of Antiproliferative Activity Against Select Cancer Cell Lines

*Jonathan A. Stefely,<sup>†</sup> Rahul Palchaudhuri,<sup>‡</sup> Patricia A. Miller,<sup>†</sup> Rebecca J. Peterson,<sup>†</sup> Garrett C. Moraski,<sup>†</sup> Paul J. Hergenrother,<sup>‡</sup> Marvin J. Miller<sup>\*†</sup>*

<sup>†</sup>Department of Chemistry and Biochemistry, University of Notre Dame, Notre Dame, Indiana 46556

<sup>‡</sup>Department of Chemistry, Roger Adams Laboratory, University of Illinois, Urbana, Illinois 61801

\*To whom correspondence should be addressed: mmiller1@nd.edu

### Contents

|                                                              |     |
|--------------------------------------------------------------|-----|
| Chemistry: General Information .....                         | S2  |
| Chemistry: Experimental Procedures and Analytical Data ..... | S3  |
| In Vitro MCF-7 Assay .....                                   | S14 |
| In Vitro U-937 Assay .....                                   | S26 |
| In Vitro NCI60 Assay .....                                   | S35 |
| COMPARE Analysis .....                                       | S37 |
| In Vitro Tubulin Polymerization Assay .....                  | S45 |
| Cell Cycle Arrest .....                                      | S45 |
| Confocal Microscopy .....                                    | S52 |

## Chemistry: General Information

All reagents were purchased from Aldrich, Arcos, Advanced ChemTech, and Fisher and used without purification unless otherwise indicated. Tetrahydrofuran was distilled from a mixture of sodium metal and benzophenone ketyl. Acetonitrile and triethylamine were distilled from CaH<sub>2</sub>. All other solvents were used without purification.

NMR spectra were recorded on a Varian Unityplus 300 MHz spectrometer, Varian Inova 500 MHz spectrometer, or Varian 600 MHz spectrometer at ambient temperature. Chemical shifts are indicated in  $\delta$  values (ppm) from internal reference peaks (TMS <sup>1</sup>H 0.00; CDCl<sub>3</sub> <sup>1</sup>H 7.27, <sup>13</sup>C 77.00; CD<sub>3</sub>OD <sup>1</sup>H 3.31, <sup>13</sup>C 49.15; DMSO-d<sub>6</sub> <sup>1</sup>H 2.50, <sup>13</sup>C 39.51). Coupling constants (*J*) were measured using ACD/SpecManager Version 10 and are reported in hertz (Hz) (where, s = singlet, bs = broad singlet, d = doublet, dd = double doublet, bd = broad doublet, ddd = double doublet of dublet, t = triplet, tt = triple triplet, q = quartet, m = multiplet).

Infrared spectra were recorded on an FT-IR spectrometer using thin films on NaCl plates. Melting points were measured on a Thomas Hoover melting point apparatus and are uncorrected. TLC was performed with aluminum backed Merck silica gel 60 F<sub>254</sub> using UV (254 nm) light, potassium permanganate stain, ceric ammonium molybdate stain, or ninhydrin for visualization.

The LC/HRMS analyses were carried out on Waters ZQ instrument consisting of chromatography module Alliance HT, photodiode array detector 2996, and mass spectrometer Micromass ZQ, using a 3 x 50 mm Pro C18 YMC reverse phase column. Mobile phases: 10 mM ammonium acetate in HPLC grade water (A) and HPLC grade acetonitrile (B). A gradient was formed from 5% to 80% of B in 10 minutes at 0.7 mL/min and referred in manuscript as “method A.” A typical run is 10 minutes. The MS electrospray source operated at capillary voltage 3.5 kV and a desolvation temperature 300 °C. The HPLC analyses were carried out on a Waters 2695 instrument consisting of a photodiode array detector 996, using the Waters symmetry C<sub>18</sub> 5  $\mu$ m reverse phase column (Waters, Milford, MA, www.waters.com). Mobile phases: (a) 50% HPLC grade acetonitrile in Millipore purified water at a flow rate of 1.0 mL min<sup>-1</sup> and UV diction at 254 nm. (b) 60% HPLC grade acetonitrile in Millipore purified water at a flow rate of 1.0 mL min<sup>-1</sup> and UV diction at 254 nm and referred in manuscript as “method B.” A typical run time was 20 minutes. All compounds are  $\geq$ 95% pure as determined by HPLC or LC/HRMS as indicated above.

All reactions were conducted under argon gas unless otherwise noted. Solvents were removed *in vacuo* on a rotary evaporator. All reactions were carried out at ambient temperature (~22 °C) unless stated otherwise. Flash chromatography was performed on Sorbent Technologies silica gel 60 (32–63 μm).

Abbreviations: ACN = acetonitrile; DAST = Diethylaminosulfur trifluoride; DBU = 1,8-diazabicyclo[5.4.0]undec-7-ene; DIPEA = diisopropylethylamine; DMF = dimethylformamide; EDC = *N*-(3-dimethylaminopropyl)-*N'*-ethylcarbodiimide hydrochloride; EtOAc = ethyl acetate; HOAc = acetic acid.

### Chemistry: Experimental Procedures and Analytical Data

#### Scheme 1. Synthesis of 2-phenyloxazole-4-carboxylic acid.

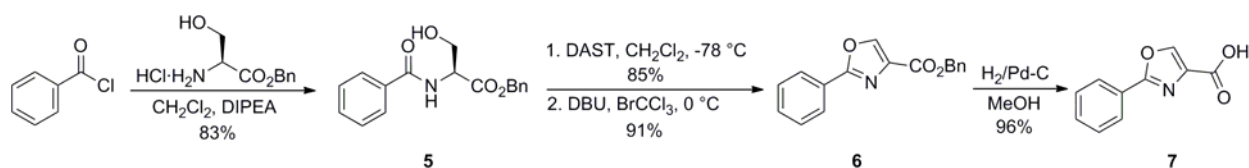

#### Synthesis of 2-phenyl-1,3-oxazole-4-carboxylic acid (7):

5

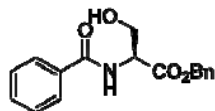

(*S*)-Benzyl 2-(benzamido)-3-hydroxypropanoate ( $C_{17}H_{17}NO_4$ , **5**). Benzoyl chloride (4.15 g, 3.4 mL, 28.6 mmol) was dissolved in anhydrous  $CH_2Cl_2$  (120 mL) and cooled to 0 °C (ice bath). L-Serine benzyl ester hydrochloride (7.2 g, 30.1 mmol) and DIPEA (9.3 g, 12.5 mL, 71.6 mmol) were added slowly and the reaction mixture was heated at reflux for 14 h. The reaction mixture was cooled and washed with 10% aqueous  $NaHCO_3$ , water, 0.5 N citric acid, and brine. The organic phase was separated, dried with  $Na_2SO_4$ , filtered, and concentrated *in vacuo* to give **5** as an off-white solid (7.15 g, 83%);  $^1H$  NMR (300 MHz,  $CDCl_3$ )  $\delta$  7.85–7.79 (m, 2H), 7.56–7.30 (m, 7H), 7.14 (d,  $J = 7.1$  Hz, 1H), 5.25 (s, 2H), 4.91 (td,  $J_1 = 7.1$  Hz,  $J_2 = 3.5$  Hz, 1H), 4.15–4.01 (m, 2H).

6

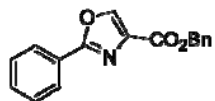

**Benzyl 2-phenyloxazole-4-carboxylate** ( $C_{17}H_{13}NO_3$ , **6**). (*S*)-Benzyl 2-(benzamido)-3-hydroxypropanoate (**5**, 7.15 g, 28.5 mmol) was dissolved in  $CH_2Cl_2$  (240 mL) and cooled to  $-78\text{ }^\circ C$  (dry ice-acetone bath). diethylaminosulfur trifluoride (DAST, 4.4 g, 3.6 mL, 27.5 mmol) was added slowly under  $Ar_{(g)}$  and stirred for 30 min.  $K_2CO_3$  (8.9 g, 64.4 mmol) was added and the reaction mixture was allowed to warm to room temperature. Once the reaction appeared complete by TLC analysis, the reaction mixture was poured into a solution of 10% aqueous  $NaHCO_3$  and extracted with  $CH_2Cl_2$  (2x). The organic phase was separated, washed with 10% aqueous  $NaHCO_3$  and brine, dried with  $Na_2SO_4$ , filtered, and concentrated *in vacuo*. The resultant crude material was purified by column chromatography ( $SiO_2$ , EtOAc/ $CH_2Cl_2$  stepwise elution, 1:1 to 10:1) to give (*S*)-Benzyl 4,5-dihydro-2-phenyloxazole-4-carboxylate as a white solid (5.7 g, 85%): mp  $51\text{--}52\text{ }^\circ C$ ; TLC  $R_f = 0.25$  ( $CH_2Cl_2$ ); FT-IR (NaCl, thin film)  $\bar{\nu}_{max}$  ( $cm^{-1}$ ) 1741 (C=O), 1643 (C=N), 1188;  $^1H$  NMR (300 MHz,  $CDCl_3$ )  $\delta$  8.04–7.92 (m, 2H), 7.57–7.29 (m, 8H), 5.26 (dd,  $J_1 = 20.9$  Hz,  $J_2 = 12.3$  Hz, 2H), 4.99 (dd,  $J_1 = 10.6$  Hz,  $J_2 = 7.9$  Hz, 1H), 4.80–4.42 (m, 2H);  $^{13}C$  NMR (126 MHz,  $CDCl_3$ )  $\delta$  170.42, 163.45, 158.40, 156.25, 135.56, 135.48, 135.14, 128.67, 128.61, 128.49, 126.70, 124.19, 118.88, 118.71, 70.31, 68.83, 67.60;  $[\alpha]_D^{25} +1.14$  ( $c = 1.54$  g/100 mL  $CHCl_3$ ).

(*S*)-Benzyl 4,5-dihydro-2-phenyloxazole-4-carboxylate (6.27 g, 22.3 mmol) was dissolved in anhydrous  $CH_2Cl_2$  (75 mL) and cooled to  $0\text{ }^\circ C$  (ice bath temperature). DBU (10 mL, 66.9 mmol) was added and followed by a slow addition of bromo-trichloromethane (6.6 mL, 66.9 mmol). After stirring for 1 h at  $0\text{ }^\circ C$ , the reaction was allowed to warm to room temperature. Once the reaction appeared complete by TLC analysis, the mixture was poured into a solution of 10% aqueous  $NaHCO_3$  and extracted with  $CH_2Cl_2$  (2x). The organic phase was separated, washed with 10% aqueous  $NaHCO_3$  and brine, dried with  $Na_2SO_4$ , filtered, and concentrated *in vacuo*. The resultant crude material was purified by column chromatography ( $SiO_2$ , EtOAc/ $CH_2Cl_2$  stepwise elution, 1:10 to 1:1) to give **6** as a white solid (5.64 g, 91%): mp =  $94\text{--}95\text{ }^\circ C$ ; TLC  $R_f = 0.37$  ( $CH_2Cl_2$ ); FT-IR (NaCl, thin film)  $\bar{\nu}_{max}$  ( $cm^{-1}$ ) 1741 (C=O), 1323, 1144, 1114;  $^1H$  NMR (300 MHz,  $CDCl_3$ )  $\delta$  8.28 (s, 1H), 8.12 (dt,  $J_1 = 4.9$  Hz,  $J_2 = 4.7$  Hz,  $J_3 = 3.1$  Hz, 2H), 7.52–7.31 (m, 8H), 5.41 (s, 2H);  $^{13}C$  NMR (126 MHz,  $CDCl_3$ )  $\delta$  162.49, 161.13, 143.84, 135.47, 134.32, 131.15, 128.96, 128.78, 128.57, 128.50, 128.46, 128.41, 126.86, 126.35, 66.79; HRMS-FAB ( $m/z$ )  $[M+H]^+$  calcd for  $C_{17}H_{13}NO_3$ , 280.0974; found, 280.0973.

7

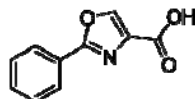

**2-Phenyloxazole-4-carboxylic acid (C<sub>10</sub>H<sub>7</sub>NO<sub>3</sub>, 7).** Benzyl 2-phenyloxazole-4-carboxylate (**6**, 5.34 g, 19.1 mmol) was dissolved in MeOH (100 mL) and EtOAc (75 mL) and purged with bubbling Ar<sub>(g)</sub>. Palladium on carbon (203 mg, 1.9 mmol) was added carefully. The reaction was sealed with a septum and evacuated by vacuum. Hydrogen gas was bubbled through the reaction mixture for 5 minutes while under vacuum. The reaction was stirred under hydrogen gas (1 atm) until the reaction appeared complete by TLC analysis. The reaction flask was purged with Ar<sub>(g)</sub>, diluted with CH<sub>2</sub>Cl<sub>2</sub> (100 mL), and filtered through glass filter paper to remove the palladium on carbon. The filtrate was concentrated to afford **7** as a white solid (3.46 g, 96%): mp = 207–208 °C; HPLC *t<sub>r</sub>* = 2.0 min (method A); <sup>1</sup>H NMR (300 MHz, CDCl<sub>3</sub>) δ 8.56 (s, 1H), 8.12–8.04 (m, 2H), 7.59–7.47 (m, 3H); <sup>13</sup>C NMR (126 MHz, CDCl<sub>3</sub>) δ 167.49, 161.46, 141.45, 140.11, 130.77, 128.87, 127.21, 126.39; HRMS–FAB (*m/z*) [M+H]<sup>+</sup> calcd for C<sub>10</sub>H<sub>8</sub>NO<sub>3</sub>, 190.0499; found, 190.0557.

**Scheme 2.** Synthesis of *N*-((1-benzyl-1*H*-1,2,3-triazol-4-yl)methyl)-2-phenyl-oxazole-carboxamide scaffold.

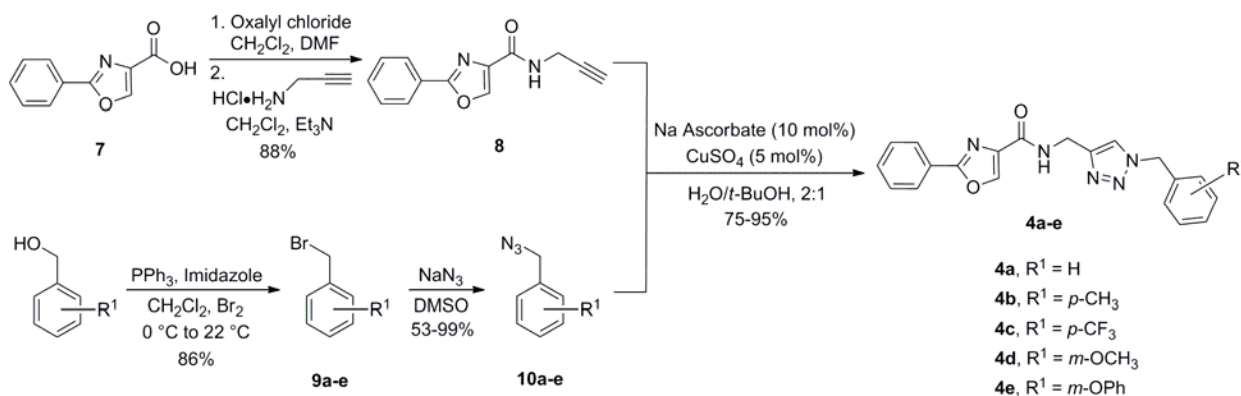

**8**

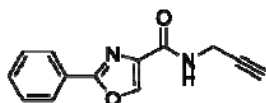

**2-Phenyl-*N*-(prop-2-ynyl)oxazole-4-carboxamide (C<sub>13</sub>H<sub>10</sub>N<sub>2</sub>O<sub>2</sub>, 8).** 2-phenyloxazole-4-carboxylic acid (**7**, 2.02 g, 10.7 mmol) was suspended in anhydrous CH<sub>2</sub>Cl<sub>2</sub> (55 mL) under Ar<sub>(g)</sub>. Oxalyl chloride (2.2 mL, 25.6 mmol) and DMF (50 μL) were added carefully to the mixture because of gas evolution. The reaction slowly turned to a light yellow homogeneous solution over 3 h. The solution was concentrated *in vacuo* to give 2-phenyloxazole-4-carboxyl chloride (2.2 grams, 100%) as an off-white solid, which was used immediately in the next reaction without characterization.

2-phenyloxazole-4-carbonyl chloride (2.20 g, 10.6 mmol) was dissolved in anhydrous CH<sub>2</sub>Cl<sub>2</sub> (40 mL) under Ar<sub>(g)</sub> and cooled to 0 °C (ice bath). Propargyl amine hydrochloride (1.09 g, 11.8 mmol) and *N,N*-diisopropylethylamine (5.6 mL, 32.1 mmol) were added with stirring. The reaction was allowed to warm to room temperature. After stirring for 20 h, TLC analysis indicated completion of the reaction. The mixture was poured into a solution of 10% aqueous NaHCO<sub>3</sub> and extracted with CH<sub>2</sub>Cl<sub>2</sub> (2x). The organic layer was separated, washed with 10% aqueous NaHCO<sub>3</sub> and brine, dried with Na<sub>2</sub>SO<sub>4</sub>, filtered, and concentrated *in vacuo*. The resultant crude material was purified by column chromatography (SiO<sub>2</sub>, EtOAc/CH<sub>2</sub>Cl<sub>2</sub> stepwise elution, 1:1 to 10:1) to give **8** as a white solid (2.13 g, 88%): mp = 123–124 °C; HPLC *t<sub>r</sub>* = 3.4–3.7 min (method A); <sup>1</sup>H NMR (500 MHz, CDCl<sub>3</sub>) δ 8.25 (s, 1H), 8.05–8.01 (m, 2H), 7.52–7.45 (m, 3H), 7.26 (bs, NH, 1H), 4.25 (dd, *J*<sub>1</sub> = 5.6 Hz, *J*<sub>2</sub> = 2.6 Hz, 2H), 2.29 (t, *J* = 2.6 Hz, 1H); <sup>13</sup>C NMR (126 MHz, CDCl<sub>3</sub>) δ 161.48, 160.22, 141.02, 136.65, 131.09, 128.87, 126.57, 79.12, 71.74, 28.69; HRMS–FAB (*m/z*) [M+H]<sup>+</sup> calcd for C<sub>13</sub>H<sub>10</sub>N<sub>2</sub>O<sub>2</sub>, 227.0815; found, 227.0789.

### Syntheses of Azides 10a – e.

#### 10a

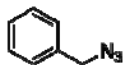

**(Azidomethyl)benzene (C<sub>7</sub>H<sub>7</sub>N<sub>3</sub>, 10a).** Sodium azide (4.9 g, 75.1 mmol) was dissolved in DMSO (150 mL) by stirring in a flame-dried 500 mL round bottom flask under Ar<sub>(g)</sub> for 12 h. A solution of benzyl bromide **9a** (7.9 mL, 68.4 mmol) was added and the reaction was stirred for 10 h. Water (200 mL) was added slowly to quench the reaction (exothermic process) and stirred until it cooled to room temperature. The mixture was poured into water (100 mL) and extracted with diethyl ether (3 x 100 mL). The organic layer was separated, washed with brine, dried with MgSO<sub>4</sub>, filtered, and concentrated *in vacuo* to afford **10a** as a clear oil (8.2 g, 91%): FT–IR (NaCl, thin film)  $\bar{\nu}_{\max}$  (cm<sup>-1</sup>) 2931, 2097 (-N<sub>3</sub>), 1496, 1456, 1256, 1203, 1078, 1029; <sup>1</sup>H NMR (300 MHz, CDCl<sub>3</sub>) δ 7.46–7.35 (m, 5H), 4.37 (s, 2H); <sup>13</sup>C NMR (126 MHz, CDCl<sub>3</sub>) δ 135.23, 128.67, 128.13, 128.06, 54.59.

#### 10b

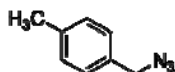

**1-(Azidomethyl)-4-methylbenzene (C<sub>8</sub>H<sub>9</sub>N<sub>3</sub>, 10b).** Sodium azide (102 mg, 1.56 mmol) was dissolved in DMSO (3.1 mL) by stirring in a flame-dried 25 mL round bottom flask under Ar<sub>(g)</sub> for 3 h. To this

solution was added  $\alpha$ -chloro-*p*-xylene (0.2 g, 1.42 mmol) and the reaction was stirred for 14 h. Water (7 mL) was added slowly to quench the reaction (exothermic process) and stirred until it cooled to room temperature. The mixture was extracted with diethyl ether (3 x 5 mL). The organic layer was separated, washed with brine, dried with  $\text{MgSO}_4$ , filtered, and concentrated *in vacuo* to afford **10b** as a clear oil (208 mg, 99%): FT-IR (NaCl, thin film)  $\bar{\nu}_{\text{max}}$  ( $\text{cm}^{-1}$ ) 2923, 2097.7 ( $-\text{N}_3$ ), 1515, 1254;  $^1\text{H}$  NMR (300 MHz,  $\text{CDCl}_3$ )  $\delta$  7.24–7.17 (m, 4H), 4.29 (s, 2H), 2.36 (s, 3H).

### 10c

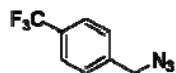

**1-(Azidomethyl)-4-(trifluoromethyl)benzene ( $\text{C}_8\text{H}_6\text{F}_3\text{N}_3$ , **10c**)**. Sodium azide (61 mg, 0.93 mmol) was dissolved in DMSO (1.9 mL) by stirring in a flame-dried 25 mL round bottom flask under  $\text{Ar}_{(\text{g})}$  for 3 h. To this solution was added 4-(bromomethyl)-1-(trifluoromethyl)benzene (0.2 g, 0.85 mmol) and the reaction was stirred for 14 h. Water (5 mL) was added slowly to quench the reaction (exothermic process) and stirred until it cooled to room temperature. The mixture was extracted with diethyl ether (3 x 7 mL). The organic layer was separated, washed with brine, dried with  $\text{MgSO}_4$ , filtered, and concentrated *in vacuo* to afford **10c** as a clear oil (91 mg, 53%): FT-IR (NaCl, thin film)  $\bar{\nu}_{\text{max}}$  ( $\text{cm}^{-1}$ ) 2936, 2105 ( $-\text{N}_3$ ), 1620, 1420, 1328, 1166, 1125, 1057;  $^1\text{H}$  NMR (300 MHz,  $\text{CDCl}_3$ )  $\delta$  7.65 (d,  $J = 8.1$  Hz, 2H), 7.49–7.41 (m, 2H), 4.43 (s, 2H).

### 10d

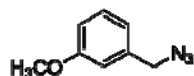

**1-(Azidomethyl)-3-methoxybenzene ( $\text{C}_8\text{H}_9\text{N}_3\text{O}$ , **10d**)**. Sodium azide (91 mg, 1.40 mmol) was dissolved in DMSO (2.8 mL) by stirring in a flame-dried 25 mL round bottom flask under  $\text{Ar}_{(\text{g})}$  for 3 h. To this solution was added 1-(chloromethyl)-3-methoxybenzene (0.2 g, 1.27 mmol) and the reaction was stirred for 14 h. Water (7 mL) was added slowly to quench the reaction (exothermic process) and stirred until it cooled to room temperature. The mixture was extracted with diethyl ether (3 x 7 mL). The organic layer was separated, washed with brine, dried with  $\text{MgSO}_4$ , filtered, and concentrated *in vacuo* to afford **10d** as a clear oil (207 mg, 99%): FT-IR (NaCl, thin film)  $\bar{\nu}_{\text{max}}$  ( $\text{cm}^{-1}$ ) 3005, 2940, 2837, 2099 ( $-\text{N}_3$ ), 1602, 1587, 1456, 1437, 1343, 1266, 1152, 1051;  $^1\text{H}$  NMR (300 MHz,  $\text{CDCl}_3$ )  $\delta$  7.30 (t,  $J = 7.7$  Hz, 1H), 6.94–6.84 (m, 3H), 4.32 (s, 2H), 3.83 (s, 3H).

10e

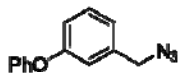

**1-(Azidomethyl)-3-phenoxybenzene** ( $C_{13}H_{11}N_3O$ , **10e**). Sodium azide (1.02 g, 15.5 mmol) was dissolved in DMSO (20 mL) by stirring in a flame-dried 50 mL round bottom flask under Ar(g) for 1 h. A solution of 3-phenoxybenzyl bromide **9e** (3.70 g, 14.1 mmol) in DMSO (5 mL) was added and stirred for 10 h. Water (10 mL) was added slowly to quench the reaction (exothermic process) and stirred until it cooled to room temperature. The mixture was poured into water (20 mL) and extracted with ethyl acetate (3 x 20 mL). The organic layer was separated, washed with brine, dried with  $MgSO_4$ , filtered, and concentrated *in vacuo* to afford **10e** as a clear oil (3.11 g, 98.1%): FT-IR (NaCl, thin film)  $\bar{\nu}_{max}$  ( $cm^{-1}$ ) 3040, 2111 (- $N_3$ ) 1583, 1484, 1445, 1341, 1231, 1211, 1162, 1142;  $^1H$  NMR (300 MHz,  $CDCl_3$ )  $\delta$  7.41–7.31 (m, 3H), 7.14 (m, 1H), 6.95–7.09 (m, 5H), 4.32 (s, 2H);  $^{13}C$  NMR (151 MHz,  $CDCl_3$ )  $\delta$  157.77, 156.75, 137.26, 130.17, 129.83, 123.59, 122.76, 119.14, 118.47, 118.25, 54.42.

**Triazoles 4a – e can be prepared by the general method described in this manuscript.**

4a

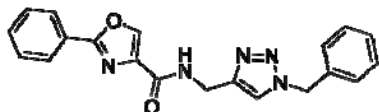

**N-((1-benzyl-1H-1,2,3-triazol-4-yl)methyl)-2-phenyloxazole-4-carboxamide** ( $C_{20}H_{17}N_5O_2$ , **4a**). mp 180–182 °C; HPLC  $t_r$  = 4.4 min (method A);  $^1H$  NMR (300 MHz,  $CDCl_3$ )  $\delta$  8.22 (s, 1H), 8.06–7.99 (m, 2H), 7.60 (bs, NH, 1H), 7.53 (s, 1H), 7.48 (dd,  $J_1$  = 5.1 Hz,  $J_2$  = 1.9 Hz, 3H), 7.41–7.24 (m, 5H), 5.51 (s, 2H), 4.71 (d,  $J$  = 6.1 Hz, 2H);  $^{13}C$  NMR (126 MHz,  $CDCl_3$ )  $\delta$  161.46, 160.67, 144.93, 140.78, 136.90, 134.39, 131.08, 129.12, 128.89, 128.79, 128.13, 126.59, 126.46, 122.21, 54.23, 34.49; HRMS-FAB ( $m/z$ )  $[M+H]^+$  calcd for  $C_{20}H_{18}N_5O_2$ , 260.1455; found, 360.1481.

4b

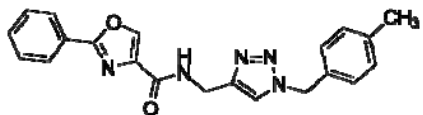

**N-((1-(4-methylbenzyl)-1H-1,2,3-triazol-4-yl)methyl)-2-phenyloxazole-4-carboxamide** ( $C_{21}H_{19}N_5O_2$ , **4b**). mp 178–179 °C; HPLC  $t_r$  = 7.45 min (method B);  $^1H$  NMR (300 MHz,  $CDCl_3$ )  $\delta$  8.22 (s, 1H),



8.04–8.00 (m, 2H), 7.59 (s, 1H, NH), 7.51–7.45 (m, 4H), 7.18 (s, 4H), 5.46 (s, 2H), 4.71 (d,  $J = 6.1$  Hz, 2H), 2.34 (s, 3H);  $^{13}\text{C}$  NMR (126 MHz,  $\text{CDCl}_3$ )  $\delta$  161.73, 160.92, 145.11, 141.05, 139.02, 137.20, 131.64, 131.35, 130.06, 129.17, 128.48, 126.87, 126.76, 122.35, 54.32, 34.77, 21.43; HRMS–FAB ( $m/z$ )  $[\text{M}+\text{H}]^+$  calcd for  $\text{C}_{21}\text{H}_{19}\text{N}_5\text{O}_2$ , 374.1617; found, 374.1622.

4c

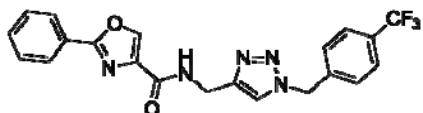

**2-Phenyl-*N*-((1-(4-(trifluoromethyl)benzyl)-1*H*-1,2,3-triazol-4-yl)methyl)oxazole-4-carboxamide**

( $\text{C}_{21}\text{H}_{16}\text{F}_3\text{N}_5\text{O}_2$ , **4c**). mp 183–184 °C; HPLC  $t_r = 8.0$  min (method B);  $^1\text{H}$  NMR (300 MHz,  $\text{CDCl}_3$ )  $\delta$  8.22 (s, 1H), 8.02 (m, 2H), 7.65–7.59 (m, 3H), 7.56–7.41 (m, 3H), 7.38 (d,  $J = 8.1$  Hz, 2H), 5.57 (s, 2H), 4.71 (d,  $J = 6.1$  Hz, 2H);  $^{13}\text{C}$  NMR (126 MHz,  $\text{CDCl}_3$ )  $\delta$  161.52, 160.75, 145.35, 140.81, 138.38, 136.86, 131.13, 130.91, 128.91, 128.25, 126.59, 126.43, 126.16, 126.13, 126.10, 124.80, 122.46, 53.51, 34.49; HRMS–FAB ( $m/z$ )  $[\text{M}+\text{H}]^+$  calcd for  $\text{C}_{21}\text{H}_{16}\text{F}_3\text{N}_5\text{O}_2$ , 428.1337; found, 428.1328.

4d

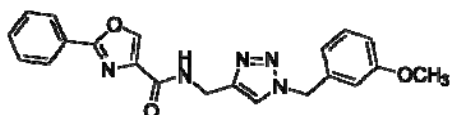

***N*-((1-(3-Methoxybenzyl)-1*H*-1,2,3-triazol-4-yl)methyl)-2-phenyloxazole-4-carboxamide**

( $\text{C}_{21}\text{H}_{19}\text{N}_5\text{O}_3$ , **4d**). mp 131–132 °C; HPLC  $t_r = 7.9$  min (method B);  $^1\text{H}$  NMR (300 MHz,  $\text{CDCl}_3$ )  $\delta$  8.22 (s, 1H), 8.05–7.99 (m, 2H), 7.59 (bs, 1H, NH), 7.53 (s, 1H), 7.51–7.44 (m, 3H), 7.32–7.24 (m, 1H), 6.94–6.76 (m, 3H), 5.47 (s, 2H), 4.71 (d,  $J = 6.1$  Hz, 2H), 3.77 (s, 3H);  $^{13}\text{C}$  NMR (126 MHz,  $\text{CDCl}_3$ )  $\delta$  161.45, 160.66, 160.05, 144.93, 140.77, 136.91, 135.82, 131.06, 130.19, 128.88, 126.59, 126.46, 122.22, 120.30, 114.24, 113.69, 55.28, 54.16, 34.50; HRMS–FAB ( $m/z$ )  $[\text{M}+\text{H}]^+$  calcd for  $\text{C}_{21}\text{H}_{19}\text{N}_5\text{O}_3$ , 390.1566; found, 390.1578.

4e

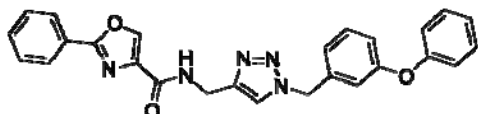

***N*-((1-(3-Phenoxybenzyl)-1*H*-1,2,3-triazol-4-yl)methyl)-2-phenyloxazole-4-carboxamide**

( $\text{C}_{26}\text{H}_{21}\text{N}_5\text{O}_3$ , **4e**). mp 134–135 °C; HPLC  $t_r = 8.6$  min (method B);  $^1\text{H}$  NMR (300 MHz,  $\text{CDCl}_3$ )  $\delta$  8.22 (s, 1H), 8.03 (dd,  $J_1 = 6.6$  Hz,  $J_2 = 3.2$  Hz, 2H), 7.60 (bs, 1H, NH), 7.54 (s, 1H), 7.48 (dd,  $J_1 = 5.2$  Hz,  $J_2$

=1.9 Hz, 3H), 7.40–7.27 (m, 3H), 7.19–6.88 (m, 6H), 5.47 (s, 2H), 4.72 (d,  $J = 6.1$  Hz, 2H);  $^{13}\text{C}$  NMR (126 MHz,  $\text{CDCl}_3$ )  $\delta$  161.47, 160.68, 158.05, 156.36, 145.01, 140.79, 136.90, 136.27, 131.08, 130.47, 129.87, 128.89, 126.59, 126.45, 123.81, 122.48, 122.29, 119.26, 118.58, 118.06, 53.87, 34.49; HRMS–FAB ( $m/z$ )  $[\text{M}+\text{H}]^+$  calcd for  $\text{C}_{26}\text{H}_{21}\text{N}_5\text{O}_3$ , 452.1723; found, 452.1748.

**Scheme 3.** Synthesis of *N*-((1-benzyl-1*H*-1,2,3-triazol-4-yl)methyl)arylamide scaffold.

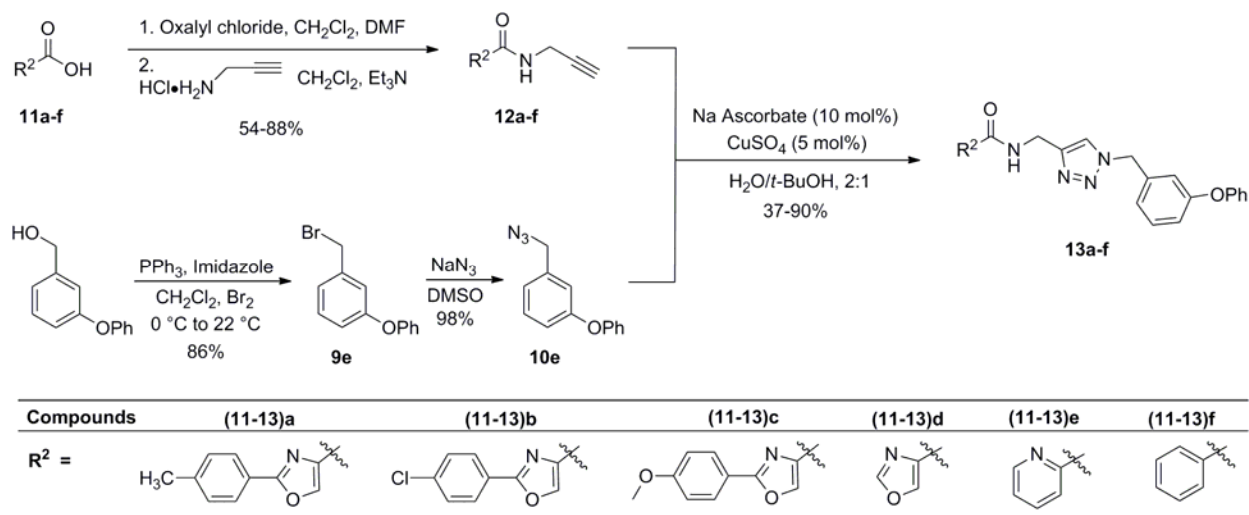

**Alkynes 12a – f can all be prepared by the methods described for compound 8 in this manuscript.**

**12a**

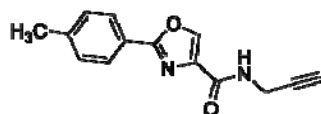

*N*-((Prop-2-ynyl)-2-*p*-tolylloxazole-4-carboxamide ( $\text{C}_{14}\text{H}_{12}\text{N}_2\text{O}_2$ , **12a**). mp 154–155 °C; HPLC  $t_r$  = 4.3–4.4 min (method A);  $^1\text{H}$  NMR (500 MHz,  $\text{CDCl}_3$ )  $\delta$  8.22 (s, 1H), 7.92 (d,  $J = 8.2$  Hz, 2H), 7.28 (d,  $J = 7.9$  Hz, 2H), 7.25 (bs, NH, 1H), 4.25 (dd,  $J_1 = 5.6$  Hz,  $J_2 = 2.6$  Hz, 2H), 2.41 (s, 1H), 2.28 (t,  $J = 2.6$  Hz, 1H);  $^{13}\text{C}$  NMR (126 MHz,  $\text{CDCl}_3$ )  $\delta$  161.73, 160.33, 141.55, 140.73, 136.54, 129.60, 126.55, 123.76, 79.16, 71.73, 28.69, 21.56; HRMS–FAB ( $m/z$ )  $[\text{M}+\text{H}]^+$  calcd for  $\text{C}_{14}\text{H}_{12}\text{N}_2\text{O}_2$ , 241.0972; found, 241.0994.

**12b**

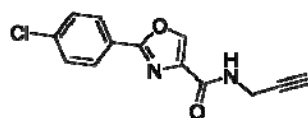

**2-(4-Chlorophenyl)-N-(prop-2-ynyl)oxazole-4-carboxamide (C<sub>13</sub>H<sub>9</sub>ClN<sub>2</sub>O<sub>2</sub>, 12b).** mp 146–147 °C; HPLC  $t_r$  = 4.6–4.7 min (method A); <sup>1</sup>H NMR (500 MHz, CDCl<sub>3</sub>) δ 8.22 (s, 1H), 7.93 (d,  $J$  = 8.6 Hz, 2H), 7.42 (d,  $J$  = 8.6 Hz, 2H), 7.21 (bs, NH, 1H), 4.24 (dd,  $J_1$  = 5.6 Hz,  $J_2$  = 2.5 Hz, 2H), 2.29 (t,  $J$  = 2.5 Hz, 1H); <sup>13</sup>C NMR (126 MHz, CDCl<sub>3</sub>) δ 160.53, 160.00, 141.17, 137.29, 136.78, 129.21, 127.83, 124.87, 79.06, 71.79, 28.70; HRMS–FAB (m/z) [M+H]<sup>+</sup> calcd for C<sub>13</sub>H<sub>9</sub>ClN<sub>2</sub>O<sub>2</sub>, 261.0425; found, 461.0451.

**12c**

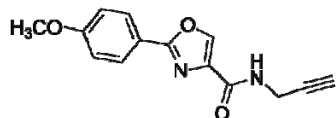

**2-(4-Methoxyphenyl)-N-(prop-2-ynyl)oxazole-4-carboxamide (C<sub>14</sub>H<sub>12</sub>N<sub>2</sub>O<sub>3</sub>, 12c).** mp 151–152 °C; HPLC  $t_r$  = 0.7–0.8 min (method A); <sup>1</sup>H NMR (300 MHz, CDCl<sub>3</sub>) δ 8.06 (s, 1H), 7.82 (d,  $J$  = 8.5 Hz, 2H), 7.13 (bs, NH, 1H), 6.84 (d,  $J$  = 8.5 Hz, 2H), 4.15–4.07 (m, 2H), 3.72 (s, 3H), 2.15 (s, 1H); <sup>13</sup>C NMR (126 MHz, CDCl<sub>3</sub>) δ 161.82, 161.57, 160.40, 140.49, 136.44, 128.83, 128.29, 119.13, 114.26, 113.69, 79.17, 71.69, 55.37, 28.66; HRMS–FAB (m/z) [M+H]<sup>+</sup> calcd for C<sub>14</sub>H<sub>12</sub>N<sub>2</sub>O<sub>3</sub>, 257.0921; found, 257.0930.

**12d**

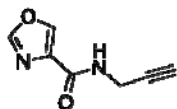

**N-(Prop-2-ynyl)oxazole-4-carboxamide (C<sub>7</sub>H<sub>6</sub>N<sub>2</sub>O<sub>2</sub>, 12d).** mp 94–95 °C; <sup>1</sup>H NMR (300 MHz, CDCl<sub>3</sub>) δ 8.26 (s, 1H), 7.88 (s, 1H), 7.14 (bs, NH, 1H), 4.23 (m, 2H), 2.28 (s, 1H); <sup>13</sup>C NMR (151 MHz, CDCl<sub>3</sub>) δ 159.85, 150.56, 141.61, 28.73, 135.40, 78.98, 71.80; HRMS–FAB (m/z) [M+H]<sup>+</sup> calcd for C<sub>7</sub>H<sub>6</sub>N<sub>2</sub>O<sub>2</sub>, 151.0508; found, 151.0496.

**12e**

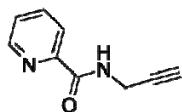

**N-(Prop-2-ynyl)picolinamide (C<sub>9</sub>H<sub>8</sub>N<sub>2</sub>O, 12e).** mp 75–76 °C; <sup>1</sup>H NMR (300 MHz, CDCl<sub>3</sub>) δ 8.56 (ddd,  $J_1$  = 4.9 Hz,  $J_2$  = 1.7 Hz,  $J_3$  = 0.9 Hz, 1H), 8.21–8.16 (m, 1H), 7.84 (dt,  $J_1$  = 7.7 Hz,  $J_2$  = 1.7 Hz, 1H), 7.43 (ddd,  $J_1$  = 7.6 Hz,  $J_2$  = 4.8 Hz,  $J_3$  = 1.2 Hz, 1H), 7.25 (bs, NH, 1H), 4.27 (dd,  $J_1$  = 5.6 Hz,  $J_2$  = 2.5 Hz, 2H), 2.26 (t,  $J$  = 2.6 Hz, 1H); <sup>13</sup>C NMR (151 MHz, CDCl<sub>3</sub>) δ 164.00, 149.27, 148.13, 137.34, 126.38, 122.30, 79.35, 71.54, 29.09; HRMS–FAB (m/z) [M+H]<sup>+</sup> calcd for C<sub>9</sub>H<sub>8</sub>N<sub>2</sub>O, 161.0715; found, 161.0725.

12f

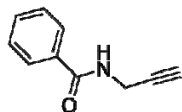

*N*-(Prop-2-ynyl)benzamide (C<sub>10</sub>H<sub>9</sub>NO, **12f**). mp 109–110 °C; <sup>1</sup>H NMR (300 MHz, CDCl<sub>3</sub>) δ 7.83–7.76 (m, 2H), 7.57–7.40 (m, 3H), 6.34 (bs, NH, 1H), 4.27 (m, 2H), 2.29 (s, 1H); <sup>13</sup>C NMR (151 MHz, CDCl<sub>3</sub>) δ 167.17, 133.64, 131.72, 128.53, 127.01, 79.48, 71.74, 29.70.

**Triazoles 13a – f can all be prepared by the method described in manuscript.**

13a

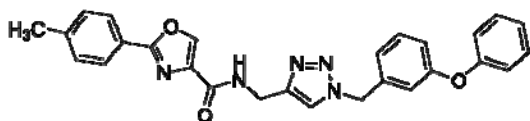

*N*-((1-(3-Phenoxybenzyl)-1*H*-1,2,3-triazol-4-yl)methyl)-2-*p*-tolylloxazole-4-carboxamide

(C<sub>27</sub>H<sub>23</sub>N<sub>5</sub>O<sub>3</sub>, **13a**). HPLC *t<sub>r</sub>* = 5.6–5.7 min (method A); mp 160–161 °C; FT-IR (NaCl, thin film)  $\bar{\nu}_{\max}$  (cm<sup>-1</sup>) 1656.6, 1594.6, 1486; <sup>1</sup>H NMR (600 MHz, CDCl<sub>3</sub>) δ 8.22 (s, 1H), 7.91 (d, *J* = 7.9 Hz, 2H), 7.60 (bs, 1H, NH), 7.54 (s, 1H), 7.25–7.36 (m, 5H), 7.12 (tt, *J*<sub>1</sub> = 7.4 Hz, *J*<sub>2</sub> = 1.1 Hz, 1H), 6.90–7.01 (m, 5H), 5.47 (s, 2H), 4.71 (d, *J* = 6.1 Hz, 2H), 2.41 (s, 3H); <sup>13</sup>C NMR (151 MHz, CDCl<sub>3</sub>) δ 161.73, 160.80, 158.08, 156.39, 145.04, 141.54, 140.51, 136.79, 136.30, 130.48, 129.87, 129.61, 126.57, 123.82, 123.78, 122.48, 122.28, 119.28, 118.59, 118.07, 53.87, 34.49, 21.57; HRMS-FAB (*m/z*) [*M*+*H*]<sup>+</sup> calcd for C<sub>27</sub>H<sub>23</sub>N<sub>5</sub>O<sub>3</sub>, 466.1874; found, 466.1867.

13b

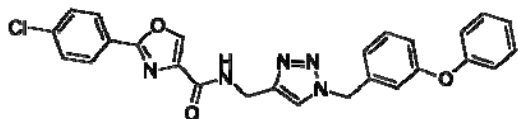

2-(4-Chlorophenyl)-*N*-((1-(3-phenoxybenzyl)-1*H*-1,2,3-triazol-4-yl)methyl)oxazole-4-carboxamide

(C<sub>26</sub>H<sub>20</sub>ClN<sub>5</sub>O<sub>3</sub>, **13b**). HPLC *t<sub>r</sub>* = 9.33 min (method B); mp 172–173 °C; <sup>1</sup>H NMR (500 MHz, CDCl<sub>3</sub>) δ 4.71 (d, *J* = 6.2 Hz, 2H), 5.47 (s, 2H), 6.90–7.02 (m, 5H), 7.12 (td, *J*<sub>1</sub> = 7.5 Hz, *J*<sub>2</sub> = 1.2 Hz, 1H), 7.28–7.37 (m, 3H), 7.41–7.47 (m, 2H), 7.56 (s, 1H), 7.64 (bs, 1H), 7.91–7.98 (m, 2H), 8.22 (d, *J* = 1.0 Hz, 1H); <sup>13</sup>C NMR (75 MHz, CDCl<sub>3</sub>) δ 34.44, 53.80, 118.03, 118.52, 119.20, 122.23, 122.44, 123.77, 124.88, 127.83, 129.19, 129.82, 130.42, 136.26, 137.02, 137.24, 140.92, 144.83, 156.32, 158.01, 160.44, 160.49; HRMS-FAB (*m/z*) [*M*+*H*]<sup>+</sup> calcd for C<sub>26</sub>H<sub>20</sub>ClN<sub>5</sub>O<sub>3</sub>, 486.1333; found, 486.1342.

13c

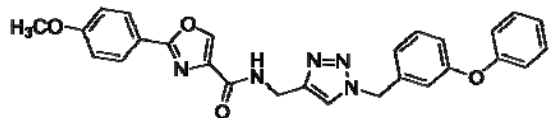

**2-(4-Methoxyphenyl)-N-((1-(3-phenoxybenzyl)-1H-1,2,3-triazol-4-yl)methyl)oxazole-4-carboxamide (C<sub>27</sub>H<sub>23</sub>N<sub>5</sub>O<sub>4</sub>, 13c).** HPLC  $t_r$  = 1.1–1.2 min (method A); mp 119.1–119.4 °C; <sup>1</sup>H NMR (300 MHz, CDCl<sub>3</sub>) δ 8.18 (s, 1 H), 7.99–7.93 (m, 2 H), 7.60 (bs, NH, 1 H), 7.55 (s, 1 H), 7.39–7.28 (m, 3 H), 7.16–7.09 (m, 1 H), 7.03–6.90 (m, 7 H), 5.47 (s, 2 H), 4.72 (d,  $J$  = 6.1 Hz, 2 H), 3.88 (s, 3 H); <sup>13</sup>C NMR (151 MHz, CDCl<sub>3</sub>) δ 161.83, 161.56, 160.84, 158.04, 156.36, 145.05, 140.26, 136.70, 136.29, 130.46, 129.85, 128.31, 123.79, 122.46, 122.27, 119.26, 119.18, 118.56, 118.04, 114.28, 55.40, 53.84, 34.46. HRMS–FAB ( $m/z$ ) [ $M+H$ ]<sup>+</sup> calcd for C<sub>27</sub>H<sub>23</sub>N<sub>5</sub>O<sub>4</sub>, 482.1823; found, 482.1803.

### 13d

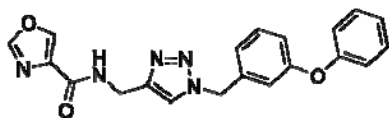

**N-((1-(3-Phenoxybenzyl)-1H-1,2,3-triazol-4-yl)methyl)oxazole-4-carboxamide (C<sub>20</sub>H<sub>17</sub>N<sub>5</sub>O<sub>3</sub>, 13d).** HPLC  $t_r$  = 6.67 min (method B); m.p. 130–131 °C; <sup>1</sup>H NMR (300 MHz, CDCl<sub>3</sub>) δ 4.69 (d,  $J$  = 6.0 Hz, 2H), 5.46 (s, 2H), 6.87–7.04 (m, 4H), 7.13 (t,  $J$  = 7.4 Hz, 1H), 7.22–7.41 (m, 3H), 7.53 (s, 2H), 7.85 (d,  $J$  = 1.0 Hz, 1H), 8.23 (d,  $J$  = 0.5 Hz, 1H); <sup>13</sup>C NMR (126 MHz, CDCl<sub>3</sub>) δ 160.30, 158.07, 156.37, 150.53, 144.84, 141.36, 136.28, 135.65, 130.47, 129.87, 123.82, 122.46, 122.24, 119.27, 118.58, 118.05, 53.85, 34.53; HRMS–FAB ( $m/z$ ) [ $M+H$ ]<sup>+</sup> calcd for C<sub>20</sub>H<sub>17</sub>N<sub>5</sub>O<sub>3</sub>, 376.1410; found, 376.1413.

### 13e

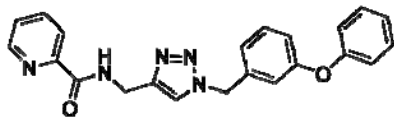

**N-((1-(3-Phenoxybenzyl)-1H-1,2,3-triazol-4-yl)methyl)picolinamide (C<sub>22</sub>H<sub>19</sub>N<sub>5</sub>O<sub>2</sub>, 13e).** HPLC  $t_r$  = 7.40 min (method B); mp 98–99 °C; <sup>1</sup>H NMR (300 MHz, CDCl<sub>3</sub>) δ 4.74 (d,  $J$  = 6.2 Hz, 2H), 5.46 (s, 2H), 6.88–7.03 (m, 4H), 7.08–7.16 (m, 1H), 7.27–7.38 (m, 3H), 7.43 (dddd,  $J_1$  = 7.4 Hz,  $J_2$  = 4.9 Hz,  $J_3$  = 1.2 Hz,  $J_4$  = 1.1 Hz, 1H), 7.53 (s, 1H), 7.79–7.90 (m, 1H), 8.18 (dq,  $J_1$  = 7.8 Hz,  $J_2$  = 1.1 Hz, 1H), 8.54 (dddd,  $J_1$  = 3.9 Hz,  $J_2$  = 1.8 Hz,  $J_3$  = 1.0 Hz,  $J_4$  = 0.8 Hz, 2H); <sup>13</sup>C NMR (126 MHz, CDCl<sub>3</sub>) δ 164.41, 158.04, 156.37, 149.51, 148.18, 145.23, 137.28, 136.34, 130.44, 129.85, 126.29, 123.79, 122.46, 122.17, 122.14, 119.26, 118.55, 118.03, 53.82, 34.94. HRMS–FAB ( $m/z$ ) [ $M+H$ ]<sup>+</sup> calcd for C<sub>22</sub>H<sub>19</sub>N<sub>5</sub>O<sub>2</sub>, 386.1617; found, 386.1601.

13f

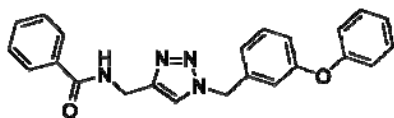

*N*-((1-(3-Phenoxybenzyl)-1*H*-1,2,3-triazol-4-yl)methyl)benzamide ( $C_{23}H_{20}N_4O_2$ , **13f**). HPLC  $t_r$  = 7.65 min (method B); mp 117–118 °C;  $^1H$  NMR (300 MHz,  $CDCl_3$ )  $\delta$  4.70 (d,  $J$  = 5.7 Hz, 2H), 5.47 (s, 2H), 6.89–7.04 (m, 5H), 7.09–7.17 (m, 1H), 7.26–7.54 (m, 6H), 7.57 (s, 1H), 7.76–7.82 (m, 2H);  $^{13}C$  NMR (126 MHz,  $CDCl_3$ )  $\delta$  35.33, 53.89, 118.06, 118.62, 119.26, 122.32, 122.47, 123.83, 126.97, 128.58, 129.88, 130.50, 131.67, 133.90, 136.24, 144.99, 156.38, 158.09, 167.38; HRMS–FAB ( $m/z$ )  $[M+H]^+$  calcd for  $C_{23}H_{20}N_4O_2$ , 385.1665; found, 385.1655.

14

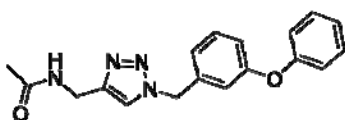

*N*-((1-(3-Phenoxybenzyl)-1*H*-1,2,3-triazol-4-yl)methyl)acetamide ( $C_{18}H_{18}N_4O_2$ , **14**). HPLC  $t_r$  = 6.08 min (method B); mp 118–119 °C  $^1H$  NMR (300 MHz,  $CDCl_3$ )  $\delta$  1.99 (s, 3H), 4.48 (d,  $J$  = 5.74 Hz, 2H), 5.46 (s, 2H), 6.15 (br. s., 1H), 6.89–7.03 (m, 5H), 7.14 (t,  $J$  = 7.4 Hz, 1H), 7.28–7.40 (m, 3H), 7.47 (s, 1H);  $^{13}C$  NMR (151 MHz,  $CDCl_3$ )  $\delta$  23.04, 34.81, 53.78, 118.04, 118.55, 119.20, 122.24, 122.42, 123.79, 129.85, 130.43, 136.24, 145.09, 156.34, 158.00, 170.22; HRMS–FAB ( $m/z$ )  $[M+H]^+$  calcd for  $C_{18}H_{19}N_4O_2$ , 323.1508; found, 323.1497.

### In Vitro MCF-7 Assay

In vitro activities against MCF-7 cells were determined with a crystal violet biomass reduction assay. MCF-7 cells were grown in  $\alpha$ -MEM media supplemented with 5% fetal bovin serum and trichostatin-A antibiotic and incubated at 37 °C and 5%  $CO_2$ . After cell inoculation, the microtiter plates were incubated at 37 °C and 5%  $CO_2$  for 24 h prior to addition of compounds. To MCF-7 cell cultures in 96-well plates (100  $\mu$ L containing 2,500 cells), DMSO solutions of compounds were added in replicates of 3. The cells were incubated in a 37 °C, 5%  $CO_2$  for 72 h. The media was removed and the cells were stained with crystal violet, washed and air-dried. The stain was eluted with solution of Triton-X-100 and optical density was measured at 595 nm. Using at least seven absorbance measurements [well background (no cells) ( $T_b$ ), vehicle control growth (C), and test growth in the presence of compound concentration levels ( $T_i$ ) ( $\geq 5$  compound concentration levels)], the percentage reduction in biomass was calculated at each of

the compound concentrations levels.  $IC_{50}$  (half maximal inhibitory concentration) values were calculated from dose response curves where  $[(T_i - T_b)/(C - T_b)] \times 100 = 50$ , which is the drug concentration resulting in a 50% reduction in the net cell mass (as measured by crystal violet staining) relative to the vehicle control cells during the compound incubation.

*N.B.  $IC_{50}$  and  $GI_{50}$  differ in that  $IC_{50}$  is calculated with  $T_b$  (well background/no cells) and  $GI_{50}$  is calculated with  $T_z$  (cells at time zero/time of addition).*

## MCF-7 $IC_{50}$ Data Summary

| ND #    | Notebook # | Compound            | Trial 1  | Trial 2  | Trial 3  | Trial 4  | AVE      | STDEV    | MCF-7 $IC_{50}$ |
|---------|------------|---------------------|----------|----------|----------|----------|----------|----------|-----------------|
| x       | x          | Colchicine          | 0.013    | nd       | nd       | nd       | nd       | nd       | 0.013           |
| x       | x          | 2-methoxy-estradiol | 0.905655 | 0.777926 | nd       | nd       | 0.84179  | 0.090318 | 0.842 ± 0.090   |
| ND-6492 | gm7-70-1   | <b>4a</b>           | 15.855   | nd       | nd       | nd       | nd       | nd       | 15.9            |
| ND-6735 | RJP-1-34-3 | <b>4b</b>           | 7.591    | nd       | nd       | nd       | nd       | nd       | 7.59            |
| ND-6730 | RJP-I-22   | <b>4c</b>           | 7.33     | nd       | nd       | nd       | nd       | nd       | 7.33            |
| ND-6731 | RJP-I-23-2 | <b>4d</b>           | 8.35     | nd       | nd       | nd       | nd       | nd       | 8.35            |
| ND-6732 | JAS-I-191  | <b>4e</b>           | 0.676514 | 0.4654   | 0.537256 | nd       | 0.559723 | 0.107335 | 0.56 ± 0.11     |
| ND-8467 | JAS-I-171  | <b>13a</b>          | 0.398593 | 0.307611 | 0.304077 | 0.311886 | 0.330542 | 0.04548  | 0.33 ± 0.045    |
| ND-8186 | JAS-I-166  | <b>13b</b>          | 3.565396 | 1.047174 | 1.091277 | nd       | 1.901282 | 1.441333 | 1.9 ± 1.4       |
| ND-7887 | JAS-II-1   | <b>13c</b>          | 1.025626 | 0.4982   | 0.4695   | nd       | 0.664    | 0.313    | 0.66 ± 0.31     |
| ND-8505 | JAS-I-190  | <b>13d</b>          | 1.038797 | 0.43823  | 0.442965 | nd       | 0.639997 | 0.345379 | 0.64 ± 0.35     |
| ND-8504 | JAS-I-189  | <b>13e</b>          | 0.071149 | 0.0331   | 0.0325   | nd       | 0.0456   | 0.0222   | 0.046 ± 0.022   |
| ND-8506 | JAS-I-188  | <b>13f</b>          | 0.251466 | 0.245464 | 0.237373 | nd       | 0.244768 | 0.007072 | 0.245 ± 0.007   |
| ND-8492 | JAS-I-181  | <b>14</b>           | 7.832581 | 5.735645 | 5.498479 | nd       | 6.355568 | 1.284616 | 6.4 ± 1.3       |

## MCF-7 Dose-Response Curve: Colchicine

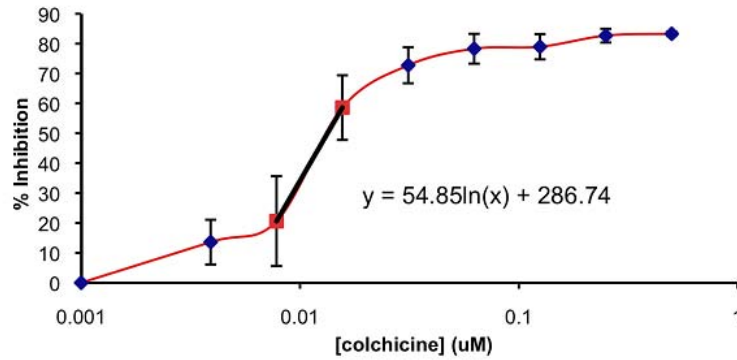

## MCF-7 Dose-Response Curves: 2-methoxyestradiol

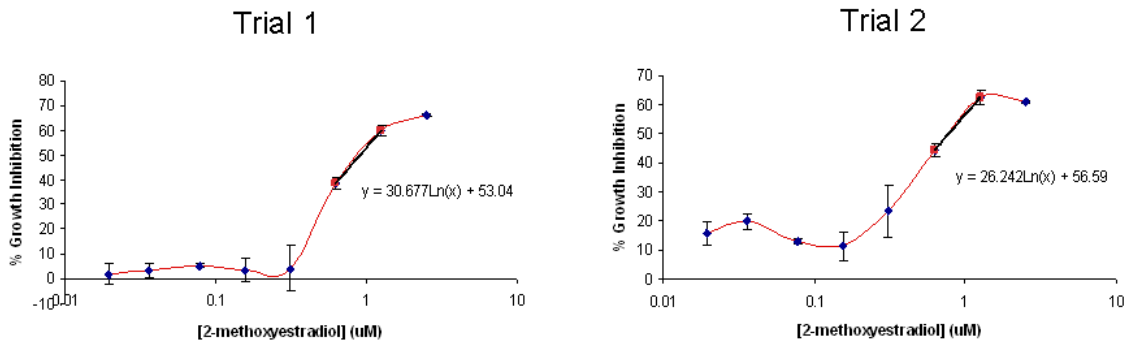



## MCF-7 Dose-Response Curve: **4a** (ND-006492)

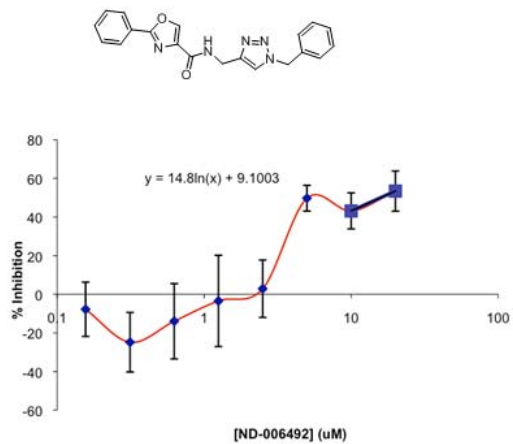

## MCF-7 Dose-Response Curve: **4b** (ND-006735)

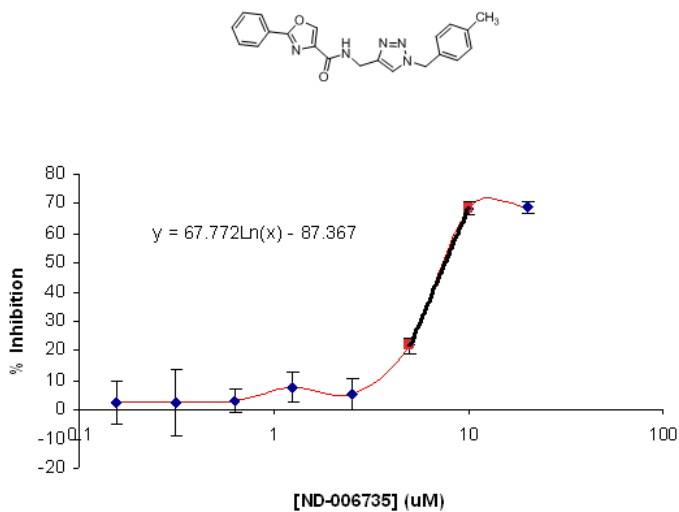



# MCF-7 Dose-Response Curves: 4e (ND-006732)

## Trial 1

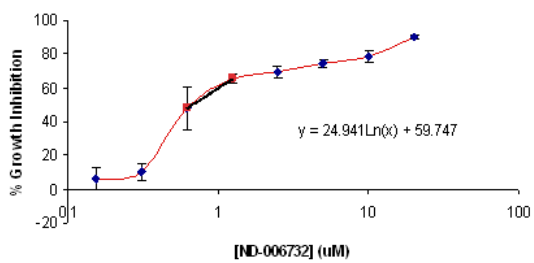

## Trial 2

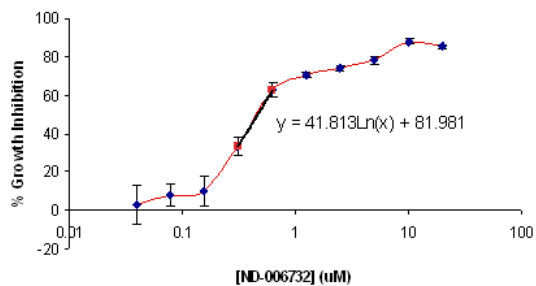

## Trial 3

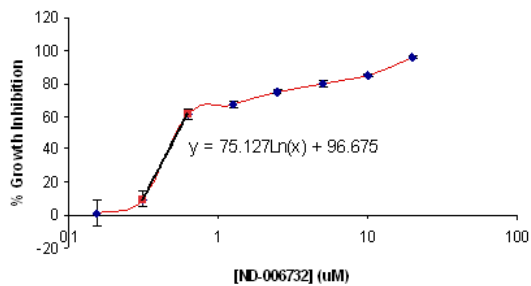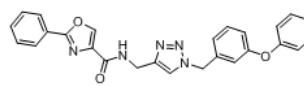

## MCF-7 Dose-Response Curves: **13a** (ND-008467)

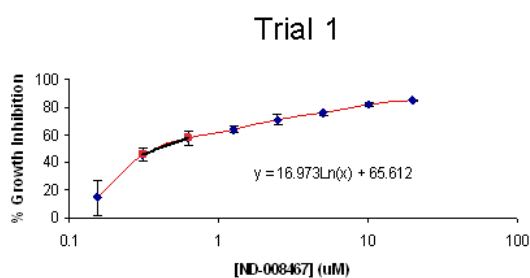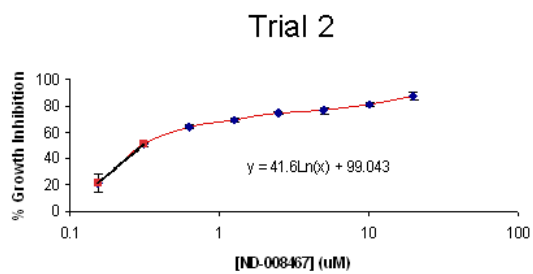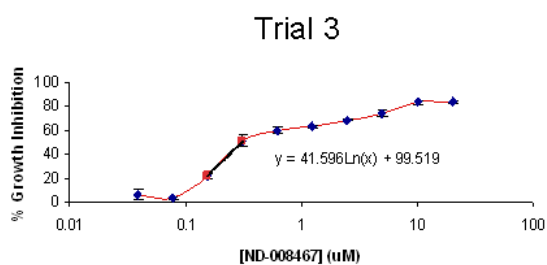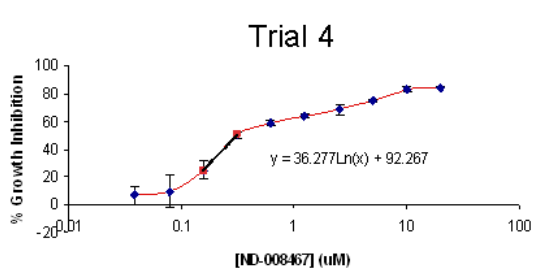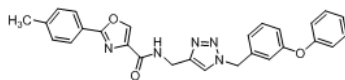

# MCF-7 Dose-Response Curves: **13b** (ND-008186)

### Trial 1

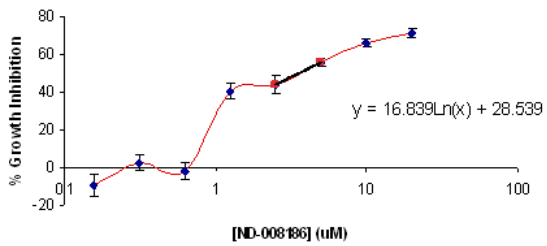

### Trial 2

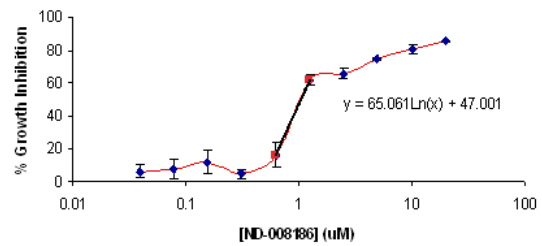

### Trial 3

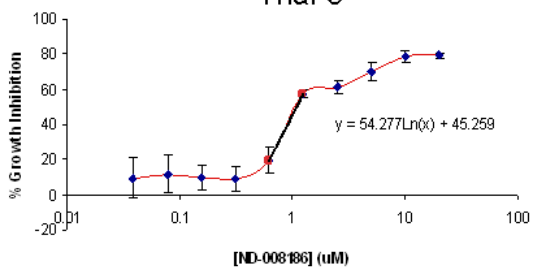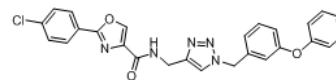

# MCF-7 Dose-Response Curves: **13c** (ND-007887)

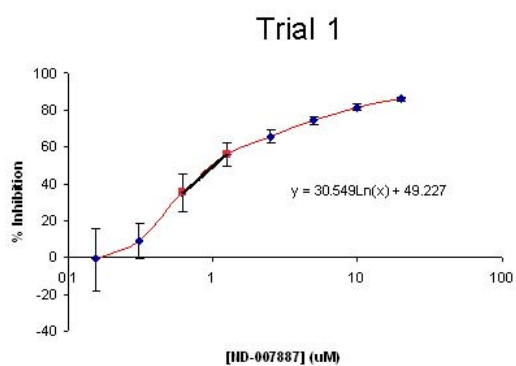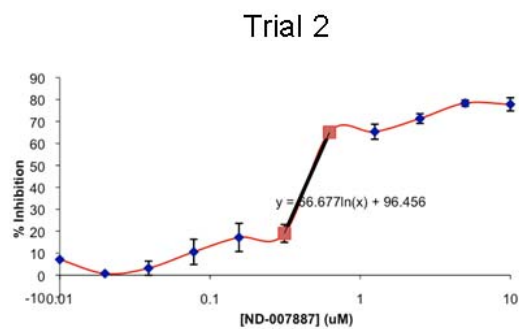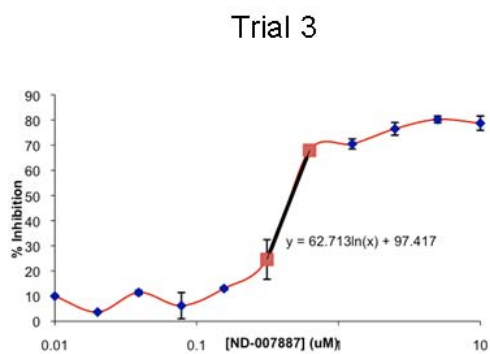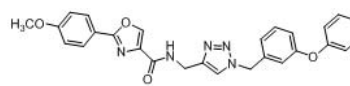

# MCF-7 Dose-Response Curves: **13d** (ND-008505)

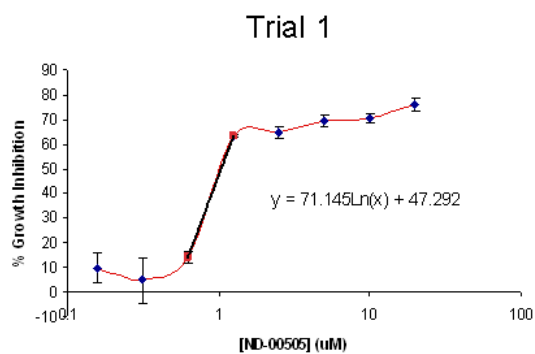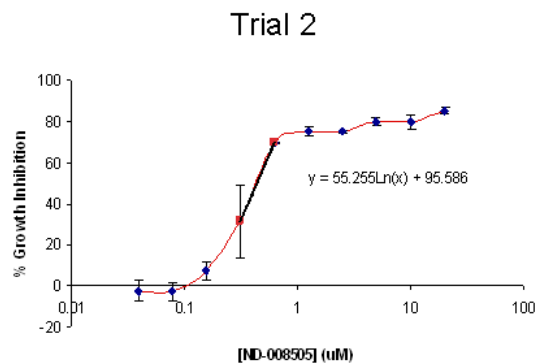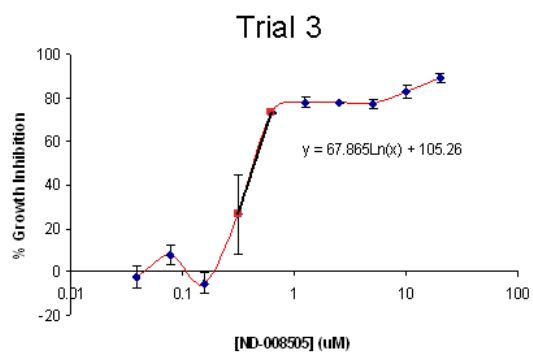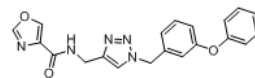

# MCF-7 Dose-Response Curves: 13e (ND-008504)

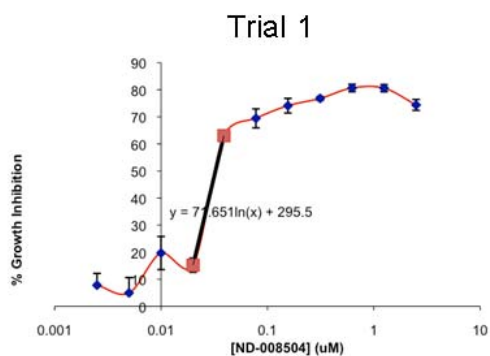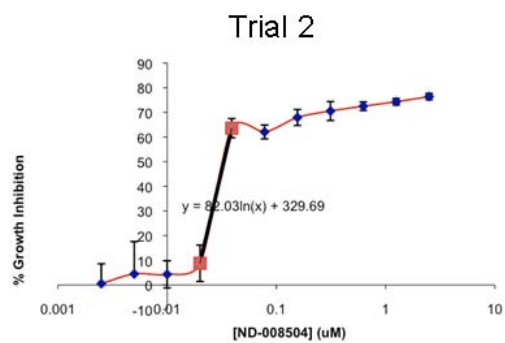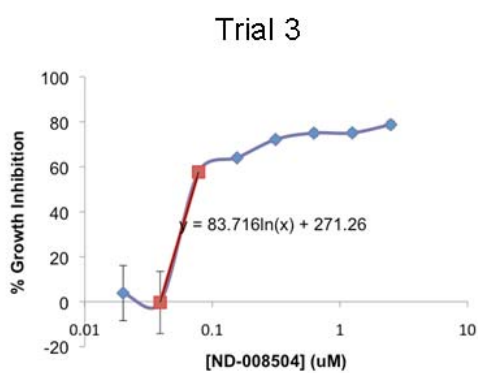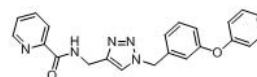



# MCF-7 Dose-Response Curves: **13f** (ND-008506)

Trial 1

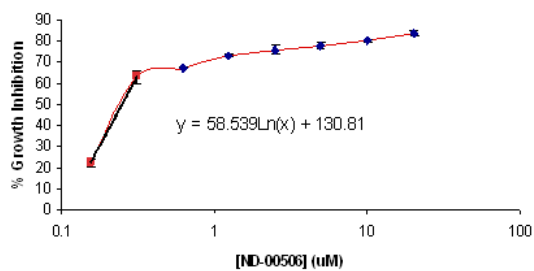

Trial 2

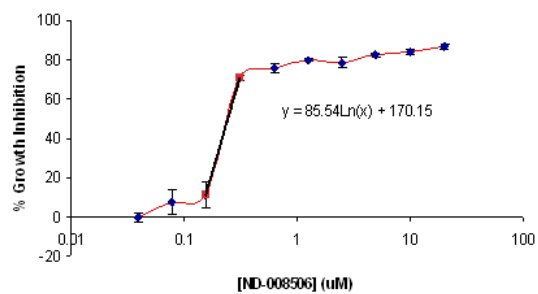

Trial 3

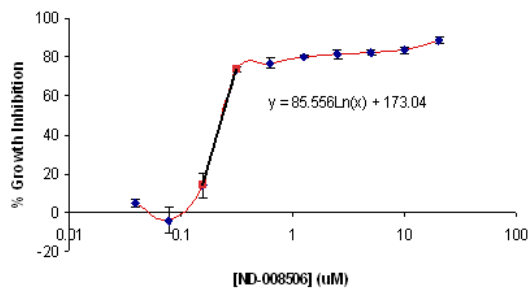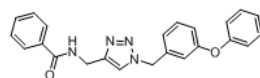

## MCF-7 Dose-Response Curves: 14 (ND-008492)

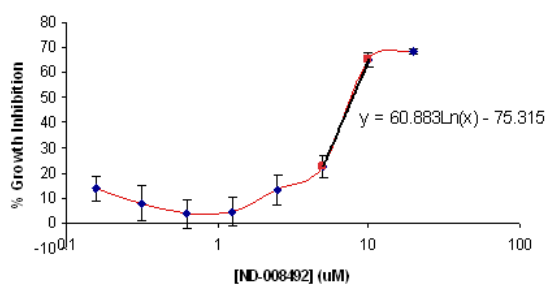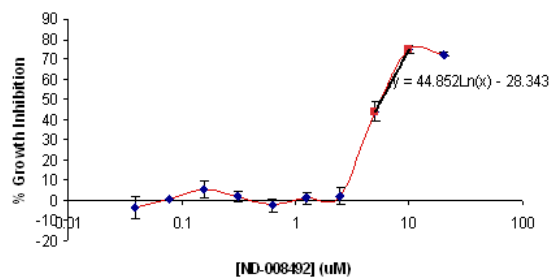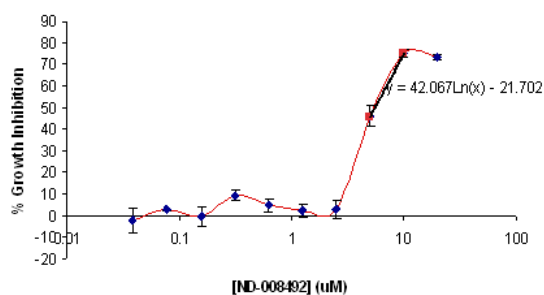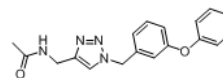

### In Vitro U-937 Assay

In vitro activities against U-937 cells were determined with a Sulforhodamine B biomass reduction assay. U-937 cells were grown in RPMI-1640 media supplemented with 10% fetal bovine serum (Gemini Bioproducts) and 1% Pen-Strep antibiotic and incubated at 37 °C in a 5% CO<sub>2</sub>, 95% humidity atmosphere. DMSO solutions of compounds were added in replicates of 5 (1 μL to each well) in 96-well plates and U-937 cells were added (199 μL containing 4 x 10<sup>4</sup> cells). The cells were incubated in a 37 °C, 5% CO<sub>2</sub>, 95% humidity incubator for 72 h. Ice-cold trichloroacetic acid (50 μL of 50% w/v) was added directly to the wells containing media and the cells fixed overnight at 4 °C. The plates were washed with water 5 times and stained with sulforhodamine B (50 μL of a 0.057% solution in 1% acetic acid) at room temperature for 30 min. The plates were washed 5 times with 1% acetic acid to remove excess sulforhodamine B and the bound-dye was released by the addition of Tris-base (200 μL of 10 mM solution). The absorbance at 510 nm measured on a Molecular Devices SpectraMax 384 plus plate reader. The percentage reduction in biomass was calculated using vehicle-treated cells and wells without cells as the 100% and 0% biomass controls respectively. IC<sub>50</sub> values were determined by fitting the dose response data to the logistic dose response equation in the software TableCurve 2D.

## U937 IC<sub>50</sub> Data Summary

| ND #    | Notebook # | Compound            | Trial 1 | Trial 2 | Trial 3 | AVE   | STDEV | U973 IC50     |
|---------|------------|---------------------|---------|---------|---------|-------|-------|---------------|
| x       | x          | Colchicine          | 0.005   | 0.011   | 0.0067  | 0.008 | 0.003 | 0.008 ± 0.003 |
| x       | x          | 2-methoxy-estradiol | 4       | 1.67    | 3.07    | 2.91  | 1.17  | 2.91 ± 1.17   |
| ND-6732 | JAS-I-191  | <b>4e</b>           | 1.58    | 1.38    | 1.23    | 1.40  | 0.18  | 1.40 ± 0.18   |
| ND-8467 | JAS-I-171  | <b>13a</b>          | 0.735   | 1.60    | 1.05    | 1.13  | 0.44  | 1.13 ± 0.44   |
| ND-7887 | JAS-II-1   | <b>13c</b>          | 1.73    | 4.43    | 5.08    | 3.75  | 1.78  | 3.75 ± 1.78   |
| ND-8505 | JAS-I-190  | <b>13d</b>          | 2.18    | 1.62    | 2.77    | 2.19  | 0.58  | 2.19 ± 0.58   |
| ND-8504 | JAS-I-189  | <b>13e</b>          | 0.242   | 0.45    | 1.06    | 0.58  | 0.42  | 0.58 ± 0.42   |
| ND-8492 | JAS-I-181  | <b>14</b>           | 50      | 15      | 18      | 28    | 19    | 28 ± 19       |

# U937 Dose-Response Curves: Colchicine

Trial 1

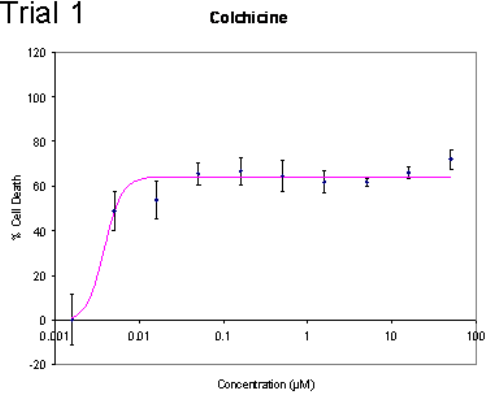

Trial 2

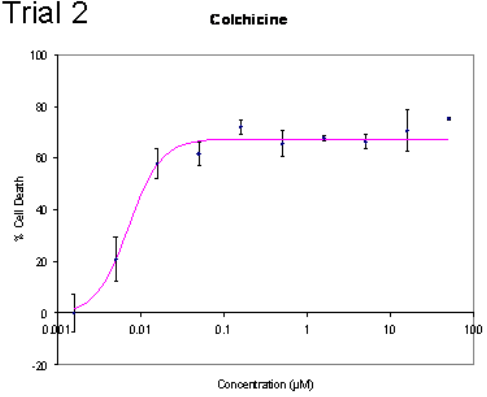

Trial 3

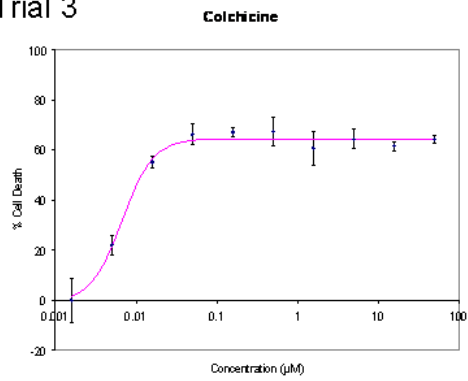

# U937 Dose-Response Curves: 2-methoxyestradiol

Trial 1

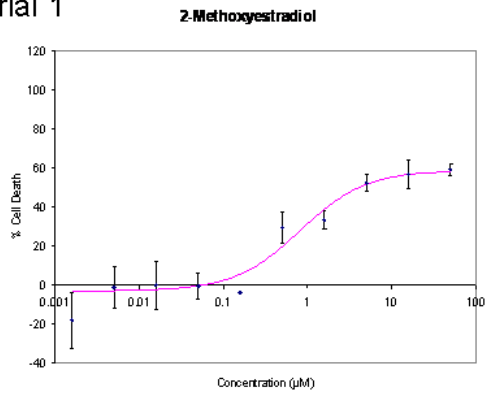

Trial 2

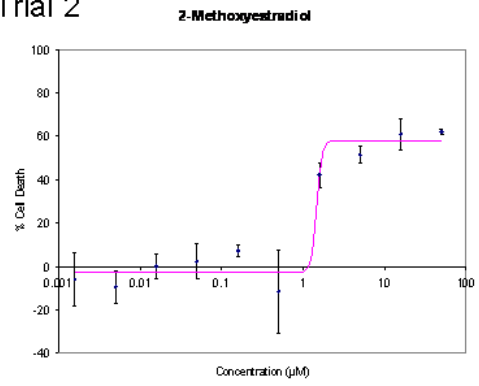

Trial 3

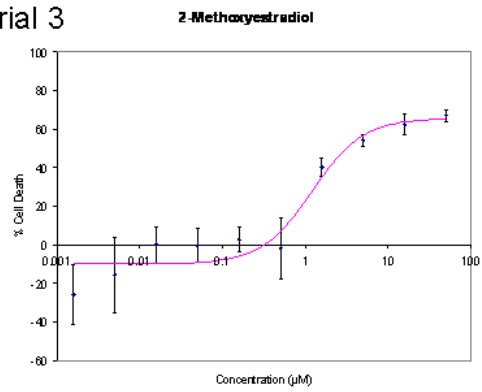

# U937 Dose-Response Curves: 4e (ND-006732)

Trial 1

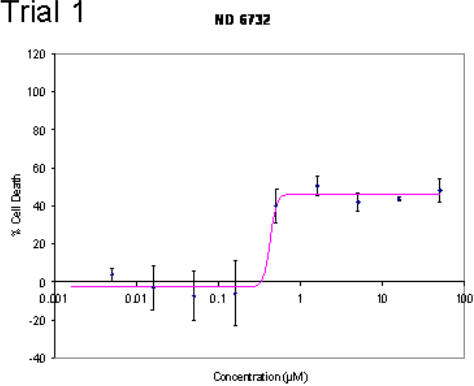

Trial 2

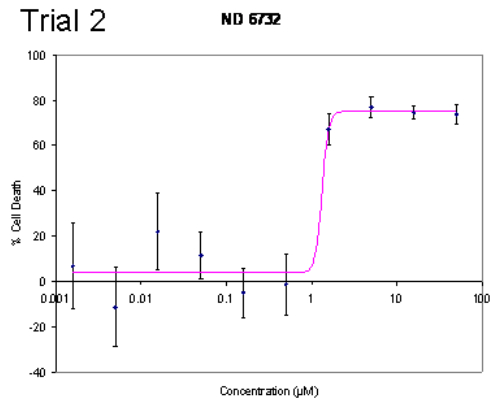

Trial 3

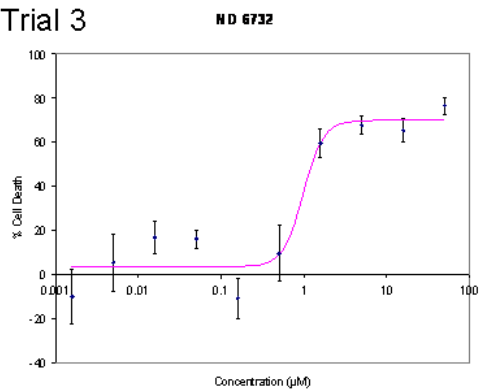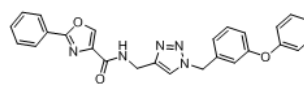

# U937 Dose-Response Curves: **13a** (ND-008467)

Trial 1

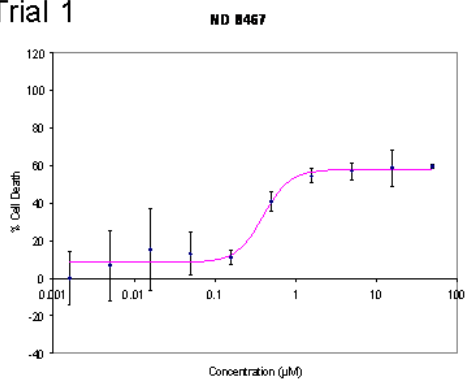

Trial 2

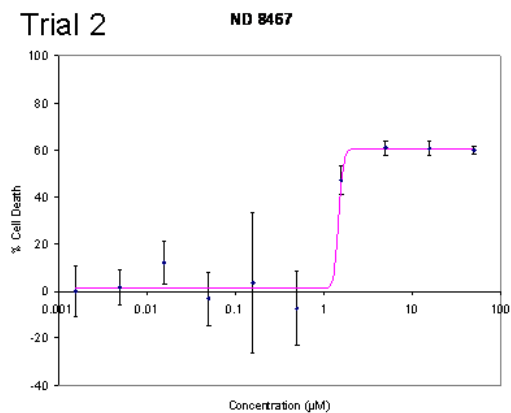

Trial 3

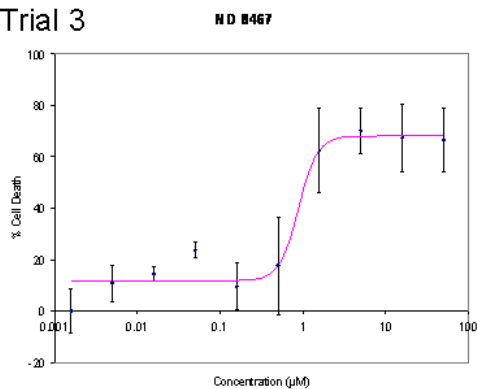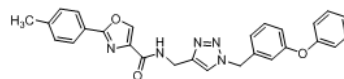

# U937 Dose-Response Curves: 13c (ND-007887)

Trial 1

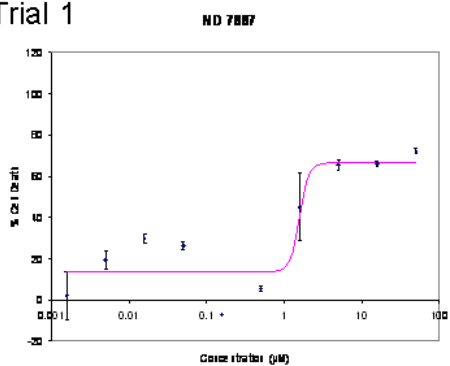

Trial 2

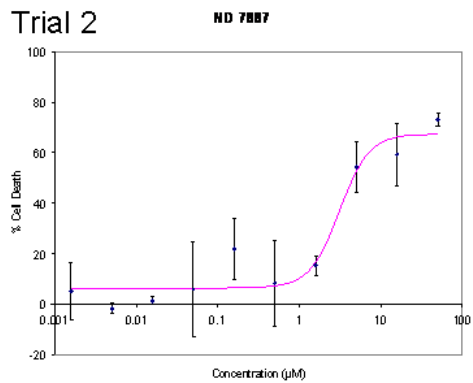

Trial 3

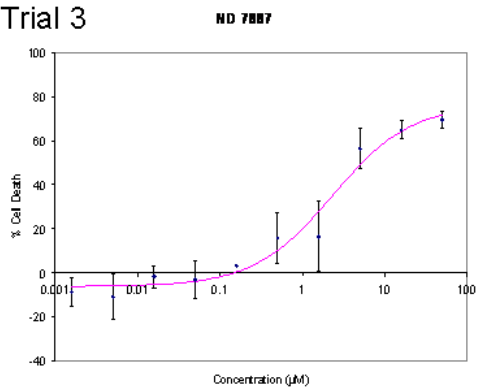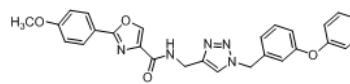



# U937 Dose-Response Curves: 13d (ND-008505)

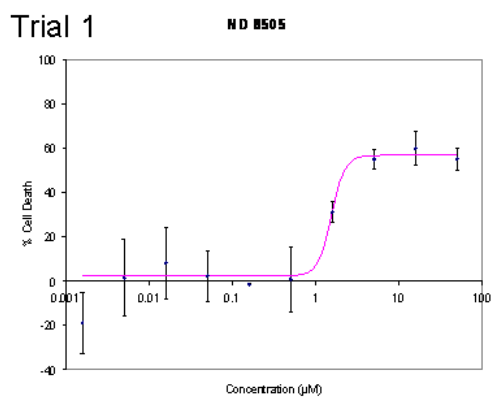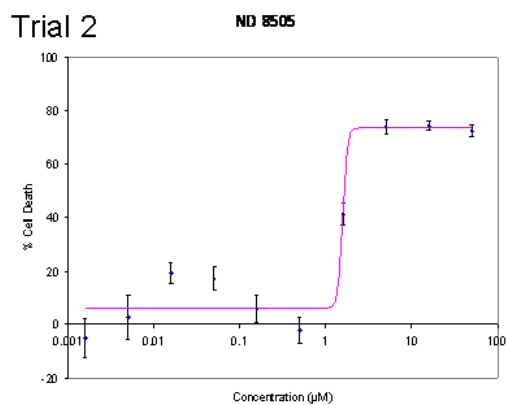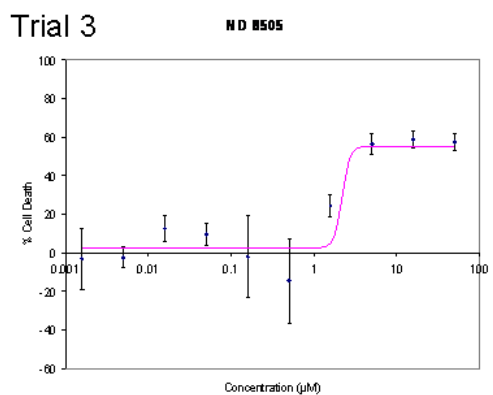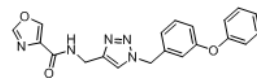

# U937 Dose-Response Curves: 13e (ND-008504)

Trial 1

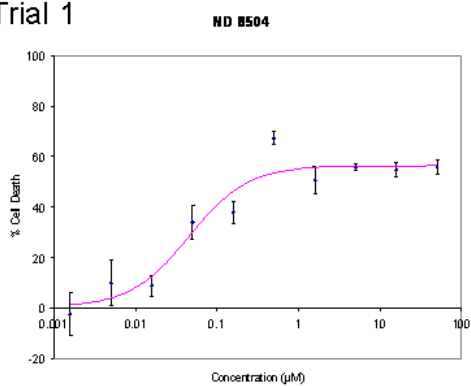

Trial 2

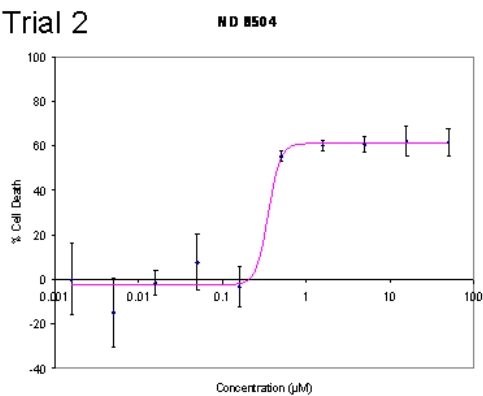

Trial 3

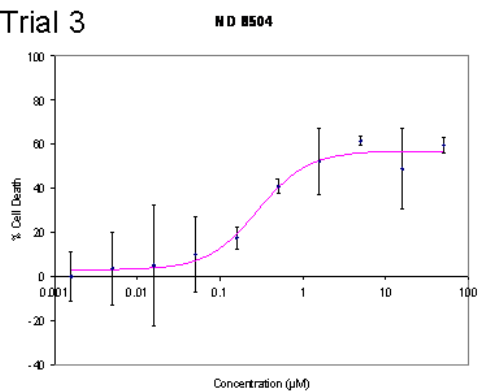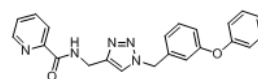

## U937 Dose-Response Curves: 14 (ND-008492)

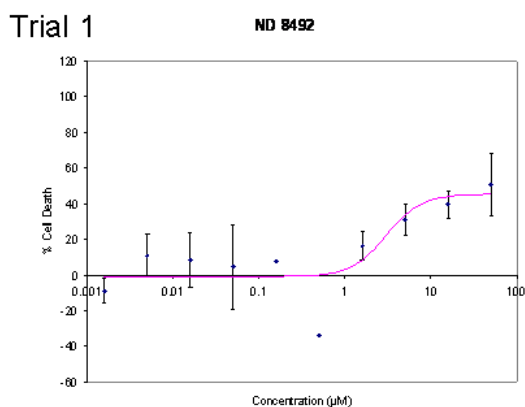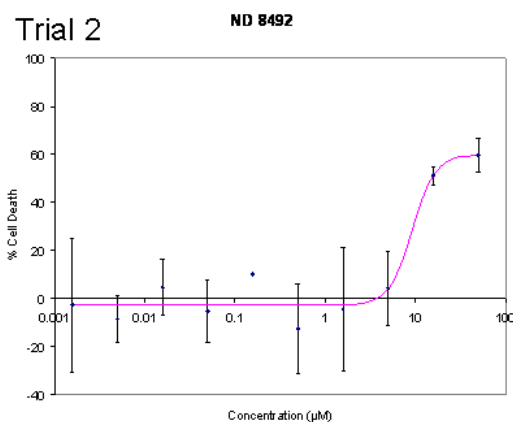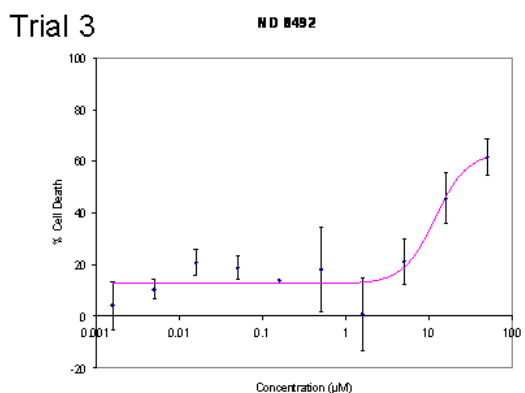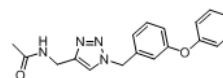

### In Vitro NCI60 Assay

The methodology of the NCI60 in vitro cancer screen can be found on-line (<http://dtp.nci.nih.gov/branches/btb/ivclsp.html>) and is reproduced here:

The human tumor cell lines of the cancer screening panel are grown in RPMI-1640 medium containing 5% fetal bovine serum and 2 mM L-glutamine. For a typical screening experiment, cells are inoculated into 96 well microtiter plates in 100 µL at plating densities ranging from 5,000 to 40,000 cells/well depending on the doubling time of individual cell lines. After cell inoculation, the microtiter plates are incubated at 37 °C, 5% CO<sub>2</sub>, 95% air and 100% relative humidity for 24 h prior to addition of experimental drugs.

After 24 h, two plates of each cell line are fixed in situ with TCA, to represent a measurement of the cell population for each cell line at the time of drug addition ( $T_2$ ). Experimental drugs are solubilized in dimethyl sulfoxide at 400-fold the desired final maximum test concentration and stored frozen prior to

use. At the time of drug addition, an aliquot of frozen concentrate is thawed and diluted to twice the desired final maximum test concentration with complete medium containing 50 µg/ml gentamicin. Additional four, 10-fold or ½ log serial dilutions are made to provide a total of five drug concentrations plus control. Aliquots of 100 µl of these different drug dilutions are added to the appropriate microtiter wells already containing 100 µl of medium, resulting in the required final drug concentrations.

Following drug addition, the plates are incubated for an additional 48 h at 37 °C, 5% CO<sub>2</sub>, 95% air, and 100 % relative humidity. For adherent cells, the assay is terminated by the addition of cold TCA. Cells are fixed in situ by the gentle addition of 50 µl of cold 50% (w/v) TCA (final concentration, 10% TCA) and incubated for 60 minutes at 4 °C. The supernatant is discarded, and the plates are washed five times with tap water and air dried. Sulforhodamine B (SRB) solution (100 µl) at 0.4% (w/v) in 1% acetic acid is added to each well, and plates are incubated for 10 minutes at room temperature. After staining, unbound dye is removed by washing five times with 1% acetic acid and the plates are air dried. Bound stain is subsequently solubilized with 10 mM trizma base, and the absorbance is read on an automated plate reader at a wavelength of 515 nm. For suspension cells, the methodology is the same except that the assay is terminated by fixing settled cells at the bottom of the wells by gently adding 50 µl of 80% TCA (final concentration, 16% TCA). Using the seven absorbance measurements [time zero, (T<sub>z</sub>), control growth, (C), and test growth in the presence of drug at the five concentration levels (T<sub>i</sub>)], the percentage growth is calculated at each of the drug concentrations levels. Percentage growth inhibition is calculated as:

$$[(T_i - T_z)/(C - T_z)] \times 100 \text{ for concentrations for which } T_i \geq T_z$$

$$[(T_i - T_z)/T_z] \times 100 \text{ for concentrations for which } T_i < T_z.$$

Three dose response parameters are calculated for each experimental agent. Growth inhibition of 50% (GI<sub>50</sub>) is calculated from  $[(T_i - T_z)/(C - T_z)] \times 100 = 50$ , which is the drug concentration resulting in a 50% reduction in the net protein increase (as measured by SRB staining) in control cells during the drug incubation. The drug concentration resulting in total growth inhibition (TGI) is calculated from  $T_i = T_z$ . The LC<sub>50</sub> (concentration of drug resulting in a 50% reduction in the measured protein at the end of the drug treatment as compared to that at the beginning) indicating a net loss of cells following treatment is calculated from  $[(T_i - T_z)/T_z] \times 100 = -50$ . Values are calculated for each of these three parameters if the level of activity is reached; however, if the effect is not reached or is exceeded, the value for that parameter is expressed as greater or less than the maximum or minimum concentration tested.

## COMPARE Analysis

**Matrix COMPARE Analysis of Compounds 4b–e.** A Matrix COMPARE analysis was performed through the Private COMPARE web site [http://dtp.nci.nih.gov/compare-web-private\\_compare/login.do](http://dtp.nci.nih.gov/compare-web-private_compare/login.do). The differential antiproliferative activity profiles (based on GI<sub>50</sub>) of compounds **4b–e** were compared to each other through the matrix compare. The NSC numbers used to retrieve the data for this Matrix COMPARE were NSC 743295 (**4b**), NSC 744736 (**4c**), NSC 744737 (**4d**), and NSC 743294 (**4e**).

**Standard COMPARE Analysis of 4e (NSC 743294).** A Standard COMPARE analysis was performed through the Private COMPARE web site [http://dtp.nci.nih.gov/compare-web-private\\_compare/login.do](http://dtp.nci.nih.gov/compare-web-private_compare/login.do). Compound **4e** was tested twice in the NCI60 5-Dose Assay, so the average data (NSC\_FIVE\_DOSE; S743294 AVGDATA –4.0) was used in the analysis. Standard COMPARE analyses were run using all three DTP Screening Data Endpoints (GI<sub>50</sub>, TGI, & LC<sub>50</sub>). The configurations for each standard COMPARE analysis can be viewed in the Supporting Information (along with the results). A standard COMPARE analysis was also performed for **4b–d** using similar procedures (COMPARE configurations and results in Supporting Information).

## COMPARE GI<sub>50</sub>: **4b** (ND-006735) [NSC-743295]

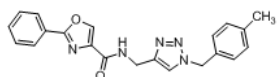

| COMPARE Seed                       |                                                           |
|------------------------------------|-----------------------------------------------------------|
| Namecode                           | Q38V-1                                                    |
| Vector ID                          | 858137                                                    |
| Ident For Display                  | NSC: S743295 Endpt: GI50<br>Expld: 0611 NS42 hiConc: -4.0 |
| Parameters for Standard COMPARE    |                                                           |
| Target Set Name                    | STANDARD_AGENTS                                           |
| Target Set Endpoint                | GI50 - 50% growth inhibition                              |
| Lookup Word                        | MJMLab                                                    |
| Minimum Correlation                | 0.2                                                       |
| Count Results to Return            | 50                                                        |
| Minimum Count<br>Common Cell Lines | 40                                                        |
| Minimum Standard<br>Deviation      | 0.05                                                      |

Job ID: 3286445683557783051

| Rank | Correlation | Target Vector NSC                                        | Target Vector Descriptor |
|------|-------------|----------------------------------------------------------|--------------------------|
| 1    | 0.702       | NSC: S325319 Endpt: GI50<br>Expld: AVGDATA hiConc: -10.0 | didemnin B               |
| 2    | 0.691       | NSC: S79037 Endpt: GI50<br>Expld: AVGDATA hiConc: -4.    | CCNU                     |
| 3    | 0.675       | NSC: S73754 Endpt: GI50<br>Expld: AVGDATA hiConc: -2.6   | fluorodopan              |
| 4    | 0.643       | NSC: S132319 Endpt: GI50<br>Expld: AVGDATA hiConc: -2.0  | indicine N-oxide         |
| 5    | 0.642       | NSC: S95441 Endpt: GI50<br>Expld: AVGDATA hiConc: -3.6   | methyl-CCNU              |

## COMPARE GI<sub>50</sub>: **4c** (ND-006730) [NSC-744736]

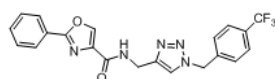

| COMPARE Seed                       |                                                           |
|------------------------------------|-----------------------------------------------------------|
| Namecode                           | Q38V-1                                                    |
| Vector ID                          | 756273                                                    |
| Ident For Display                  | NSC: S744736 Endpt: GI50<br>Expld: 0709 NS10 hiConc: -4.0 |
| Parameters for Standard COMPARE    |                                                           |
| Target Set Name                    | STANDARD_AGENTS                                           |
| Target Set Endpoint                | GI50 - 50% growth inhibition                              |
| Lookup Word                        | MJMLab                                                    |
| Minimum Correlation                | 0.2                                                       |
| Count Results to Return            | 50                                                        |
| Minimum Count<br>Common Cell Lines | 40                                                        |
| Minimum Standard<br>Deviation      | 0.05                                                      |

Job ID: 5567190687614250772

| Rank | Correlation | Target Vector NSC                                       | Target Vector Descriptor |
|------|-------------|---------------------------------------------------------|--------------------------|
| 1    | 0.49        | NSC: S192965 Endpt: GI50<br>Expld: AVGDATA hiConc: -4.0 | spirogermanium           |
| 2    | 0.486       | NSC: S192965 Endpt: GI50<br>Expld: AVGDATA hiConc: -2.0 | spirogermanium           |
| 3    | 0.469       | NSC: S163501 Endpt: GI50<br>Expld: AVGDATA hiConc: -4.0 | AT-125 (acicidin)        |
| 4    | 0.455       | NSC: S126771 Endpt: GI50<br>Expld: AVGDATA hiConc: -4.0 | dichloroallyl lawsone    |
| 5    | 0.454       | NSC: S95441 Endpt: GI50<br>Expld: AVGDATA hiConc: -4.0  | methyl-CCNU              |

## COMPARE GI<sub>50</sub>: 4d (ND-006731) [NSC-744737]

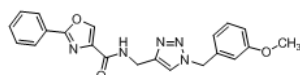

Job ID: 1011257014195225778

| COMPARE Seed                       |                                                          |
|------------------------------------|----------------------------------------------------------|
| Namecode                           | Q38V-1                                                   |
| Vector ID                          | 518243                                                   |
| Ident For Display                  | NSC: S744737 Endpt: GI50<br>Expld: 0709NS10 hiConc: -4.0 |
| Parameters for Standard COMPARE    |                                                          |
| Target Set Name                    | STANDARD_AGENTS                                          |
| Target Set Endpoint                | GI50 - 50% growth inhibition                             |
| Lookup Word                        | MJMLab                                                   |
| Minimum Correlation                | 0.2                                                      |
| Count Results to Return            | 50                                                       |
| Minimum Count<br>Common Cell Lines | 40                                                       |
| Minimum Standard<br>Deviation      | 0.05                                                     |

| Rank | Correlation | Target Vector NSC                                       | Target Vector Descriptor |
|------|-------------|---------------------------------------------------------|--------------------------|
| 1    | 0.503       | NSC: S163501 Endpt: GI50<br>Expld: AVGDATA hiConc: -4.0 | AT-125 (acicicin)        |
| 2    | 0.471       | NSC: S150014 Endpt: GI50<br>Expld: AVGDATA hiConc: -2.5 | hydrazine sulfate        |
| 3    | 0.468       | NSC: S95441 Endpt: GI50<br>Expld: AVGDATA hiConc: -4.0  | methyl-CCNU              |
| 4    | 0.459       | NSC: S141537 Endpt: GI50<br>Expld: AVGDATA hiConc: -7.0 | anguidine                |
| 5    | 0.455       | NSC: S368390 Endpt: GI50<br>Expld: AVGDATA hiConc: -3.3 | DUP785 (brequinar)       |

## COMPARE GI<sub>50</sub>: 4e (ND-006732) [NSC-743294]

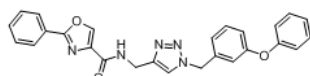

Job ID: 858380772905995545

| COMPARE Seed                       |                                                         |
|------------------------------------|---------------------------------------------------------|
| Namecode                           | Q38V-1                                                  |
| Vector ID                          | 398491                                                  |
| Ident For Display                  | NSC: S743294 Endpt: GI50<br>Expld: AVGDATA hiConc: -4.0 |
| Parameters for Standard COMPARE    |                                                         |
| Target Set Name                    | STANDARD_AGENTS                                         |
| Target Set Endpoint                | GI50 - 50% growth inhibition                            |
| Lookup Word                        | MJMLab                                                  |
| Minimum Correlation                | 0.2                                                     |
| Count Results to Return            | 50                                                      |
| Minimum Count<br>Common Cell Lines | 40                                                      |
| Minimum Standard<br>Deviation      | 0.05                                                    |

| Rank | Correlation | Target Vector NSC                                       | Target Vector Descriptor |
|------|-------------|---------------------------------------------------------|--------------------------|
| 1    | 0.541       | NSC: S743294 Endpt: GI50<br>Expld: AVGDATA hiConc: -4.0 | paclitaxel (Taxol)       |
| 2    | 0.534       | NSC: S743294 Endpt: GI50<br>Expld: AVGDATA hiConc: -4.0 | maytansine               |
| 3    | 0.50        | NSC: S743294 Endpt: GI50<br>Expld: AVGDATA hiConc: -4.0 | vincristine sulfate      |
| 4    | 0.48        | NSC: S743294 Endpt: GI50<br>Expld: AVGDATA hiConc: -4.0 | trimetrexate             |
| 5    | 0.46        | NSC: S743294 Endpt: GI50<br>Expld: AVGDATA hiConc: -4.0 | soluble Baker's Antifol  |

## COMPARE TGI: 4c (ND-006730) [NSC-744736]

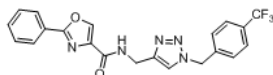

| COMPARE Seed                       |                                                      |
|------------------------------------|------------------------------------------------------|
| Namecode                           | Q38V-1                                               |
| Vector ID                          | 619734                                               |
| Ident For Display                  | NSC: S744736 Endpt:TGI<br>Expld:0709NS10 hiConc:-4.0 |
| Parameters for Standard COMPARE    |                                                      |
| Target Set Name                    | STANDARD_AGENTS                                      |
| Target Set Endpoint                | TGI – total growth inhibition                        |
| Lookup Word                        | MJMLab                                               |
| Minimum Correlation                | 0.2                                                  |
| Count Results to Return            | 50                                                   |
| Minimum Count<br>Common Cell Lines | 40                                                   |
| Minimum Standard<br>Deviation      | 0.05                                                 |

Job ID: 629443433769171751

| Rank | Correlation | Target Vector NSC                                  | Target Vector Descriptor |
|------|-------------|----------------------------------------------------|--------------------------|
| 1    | 0.652       | NSC:S127716 Endpt:TGI<br>Expld:AVGDATA hiConc:-3.4 | 5-azadeoxycytidine       |
| 2    | 0.604       | NSC:S125973 Endpt:TGI<br>Expld:AVGDATA hiConc:-6.0 | paclitaxel (Taxol)       |
| 3    | 0.587       | NSC:S284751 Endpt:TGI<br>Expld:AVGDATA hiConc:-3.5 | 8Cl-cyc-AMP              |
| 4    | 0.503       | NSC:S293015 Endpt:TGI<br>Expld:AVGDATA hiConc:-4.2 | flavoneacetic acid ester |
| 5    | 0.472       | NSC:S73754 Endpt:TGI<br>Expld:AVGDATA hiConc:-2.6  | fluorodopan              |

## COMPARE TGI: 4d (ND-006731) [NSC-744737]

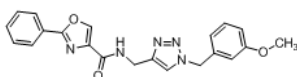

| COMPARE Seed                       |                                                      |
|------------------------------------|------------------------------------------------------|
| Namecode                           | Q38V-1                                               |
| Vector ID                          | 664179                                               |
| Ident For Display                  | NSC: S744737 Endpt:TGI<br>Expld:0709NS10 hiConc:-4.0 |
| Parameters for Standard COMPARE    |                                                      |
| Target Set Name                    | STANDARD_AGENTS                                      |
| Target Set Endpoint                | TGI – total growth inhibition                        |
| Lookup Word                        | MJMLab                                               |
| Minimum Correlation                | 0.2                                                  |
| Count Results to Return            | 50                                                   |
| Minimum Count<br>Common Cell Lines | 40                                                   |
| Minimum Standard<br>Deviation      | 0.05                                                 |

Job ID: 6400153564696226613

| Rank | Correlation | Target Vector NSC                                  | Target Vector Descriptor |
|------|-------------|----------------------------------------------------|--------------------------|
| 1    | 0.712       | NSC:S127716 Endpt:TGI<br>Expld:AVGDATA hiConc:-3.4 | 5-azadeoxycytidine       |
| 2    | 0.621       | NSC:S284751 Endpt:TGI<br>Expld:AVGDATA hiConc:-3.5 | 8Cl-cyc-AMP              |
| 3    | 0.603       | NSC:S125973 Endpt:TGI<br>Expld:AVGDATA hiConc:-6.0 | paclitaxel (Taxol)       |
| 4    | 0.498       | NSC:S73754 Endpt:TGI<br>Expld:AVGDATA hiConc:-2.6  | fluorodopan              |
| 5    | 0.481       | NSC:S293015 Endpt:TGI<br>Expld:AVGDATA hiConc:-4.2 | flavoneacetic acid ester |



# COMPARE TGI: 4e (ND-006732) [NSC-743294]

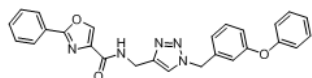

| COMPARE Seed                    |                                                        |
|---------------------------------|--------------------------------------------------------|
| Namecode                        | Q38V-1                                                 |
| Vector ID                       | 321460                                                 |
| Ident For Display               | NSC: S743294 Endpt: TGI<br>Expld: AVGDATA hiConc: -4.0 |
| Parameters for Standard COMPARE |                                                        |
| Target Set Name                 | STANDARD_AGENTS                                        |
| Target Set Endpoint             | TGI – total growth inhibition                          |
| Lookup Word                     | MJMLab                                                 |
| Minimum Correlation             | 0.2                                                    |
| Count Results to Return         | 50                                                     |
| Minimum Count Common Cell Lines | 40                                                     |
| Minimum Standard Deviation      | 0.05                                                   |

Job ID: 3381429712570732660

| Rank | Correlation | Target Vector ident                                    | Target Vector Discriptor |
|------|-------------|--------------------------------------------------------|--------------------------|
| 1    | 0.654       | NSC: S125973 Endpt: TGI<br>Expld: AVGDATA hiConc: -5.0 | paclitaxel (Taxol)       |
| 2    | 0.646       | NSC: S125973 Endpt: TGI<br>Expld: AVGDATA hiConc: -6.0 | paclitaxel (Taxol)       |
| 3    | 0.642       | NSC: S125973 Endpt: TGI<br>Expld: AVGDATA hiConc: -4.6 | paclitaxel (Taxol)       |
| 4    | 0.621       | NSC: S153858 Endpt: TGI<br>Expld: AVGDATA hiConc: -9.0 | maytansine               |
| 5    | 0.606       | NSC: S49842 Endpt: TGI<br>Expld: AVGDATA hiConc: -5.6  | vinblastine sulfate      |

# COMPARE TGI: **4b** (ND-006735) [NSC-743295]

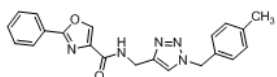

| COMPARE Seed                       |                                                       |
|------------------------------------|-------------------------------------------------------|
| Namecode                           | Q38V-1                                                |
| Vector ID                          | 558845                                                |
| Ident For Display                  | NSC: S743295 Endpt:TGI<br>Expld:0611 NS42 hiConc:-4.0 |
| Parameters for Standard COMPARE    |                                                       |
| Target Set Name                    | STANDARD_AGENTS                                       |
| Target Set Endpoint                | TGI – total growth inhibition                         |
| Lookup Word                        | MJMLab                                                |
| Minimum Correlation                | 0.2                                                   |
| Count Results to Return            | 50                                                    |
| Minimum Count<br>Common Cell Lines | 40                                                    |
| Minimum Standard<br>Deviation      | 0.05                                                  |

Job ID: 6448311945586022553

| Rank | Correlation  | Target Vector NSC                                   | Target Vector Descriptor |
|------|--------------|-----------------------------------------------------|--------------------------|
| 1    | <b>0.484</b> | NSC: S167780 Endpt:TGI<br>Expld:AVGDATA hiConc:-4.0 | asaley                   |
| 2    | <b>0.477</b> | NSC: S125973 Endpt:TGI<br>Expld:AVGDATA hiConc:-4.0 | paclitaxel (Taxol)       |
| 3    | <b>0.474</b> | NSC: S27640 Endpt:TGI<br>Expld:AVGDATA hiConc:-2.6  | 5-FUDR                   |
| 4    | <b>0.438</b> | NSC: S332598 Endpt:TGI<br>Expld:AVGDATA hiConc:-5.3 | rhizoxin                 |
| 5    | <b>0.436</b> | NSC: S24559 Endpt:TGI<br>Expld:AVGDATA hiConc:-2.9  | mitramycin               |

## COMPARE LC<sub>50</sub>: **4b** (ND-006735) [NSC-743295]

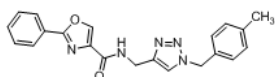

| COMPARE Seed                       |                                                           |
|------------------------------------|-----------------------------------------------------------|
| Namecode                           | Q38V-1                                                    |
| Vector ID                          | 630268                                                    |
| Ident For Display                  | NSC: S743295 Endpt: LC50<br>Expld: 0611 NS42 hiConc: -4.0 |
| Parameters for Standard COMPARE    |                                                           |
| Target Set Name                    | STANDARD_AGENTS                                           |
| Target Set Endpoint                | LC50 – 50% cell kill                                      |
| Lookup Word                        | MJMLab                                                    |
| Minimum Correlation                | 0.2                                                       |
| Count Results to Return            | 50                                                        |
| Minimum Count<br>Common Cell Lines | 40                                                        |
| Minimum Standard<br>Deviation      | 0.05                                                      |

Job ID: 3383383595683701483

| Rank | Correlation | Target Vector NSC | Target Vector Descriptor |
|------|-------------|-------------------|--------------------------|
| 1    | <0.2        |                   |                          |
| 2    |             |                   |                          |
| 3    |             |                   |                          |
| 4    |             |                   |                          |
| 5    |             |                   |                          |

## COMPARE LC<sub>50</sub>: **4c** (ND-006730) [NSC-744736]

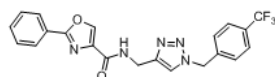

| COMPARE Seed                       |                                                           |
|------------------------------------|-----------------------------------------------------------|
| Namecode                           | Q38V-1                                                    |
| Vector ID                          | 889120                                                    |
| Ident For Display                  | NSC: S744736 Endpt: LC50<br>Expld: 0709 NS10 hiConc: -4.0 |
| Parameters for Standard COMPARE    |                                                           |
| Target Set Name                    | STANDARD_AGENTS                                           |
| Target Set Endpoint                | LC50 – 50% cell kill                                      |
| Lookup Word                        | MJMLab                                                    |
| Minimum Correlation                | 0.2                                                       |
| Count Results to Return            | 50                                                        |
| Minimum Count<br>Common Cell Lines | 40                                                        |
| Minimum Standard<br>Deviation      | 0.05                                                      |

Job ID: 4377333757265360978

| Rank | Correlation | Target Vector NSC | Target Vector Descriptor |
|------|-------------|-------------------|--------------------------|
| 1    | < 0.2       |                   |                          |
| 2    |             |                   |                          |
| 3    |             |                   |                          |
| 4    |             |                   |                          |
| 5    |             |                   |                          |

## COMPARE LC<sub>50</sub>: 4d (ND-006731) [NSC-744737]

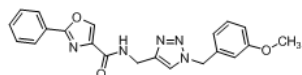

Job ID: 1019476158446175237

| COMPARE Seed                       |                                                          |
|------------------------------------|----------------------------------------------------------|
| Namecode                           | Q38V-1                                                   |
| Vector ID                          | 463441                                                   |
| Ident For Display                  | NSC: S744737 Endpt: LC50<br>Expld: 0709NS10 hiConc: -4.0 |
| Parameters for Standard COMPARE    |                                                          |
| Target Set Name                    | STANDARD_AGENTS                                          |
| Target Set Endpoint                | LC50 – 50% cell kill                                     |
| Lookup Word                        | MJMLab                                                   |
| Minimum Correlation                | 0.2                                                      |
| Count Results to Return            | 50                                                       |
| Minimum Count<br>Common Cell Lines | 40                                                       |
| Minimum Standard<br>Deviation      | 0.05                                                     |

| Rank | Correlation | Target Vector NSC | Target Vector Descriptor |
|------|-------------|-------------------|--------------------------|
| 1    | < 0.2       |                   |                          |
| 2    |             |                   |                          |
| 3    |             |                   |                          |
| 4    |             |                   |                          |
| 5    |             |                   |                          |

## COMPARE LC<sub>50</sub>: 4e (ND-006732) [NSC-743294]

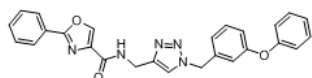

Job ID: 1401022145659285532

| COMPARE Seed                       |                                                         |
|------------------------------------|---------------------------------------------------------|
| Namecode                           | Q38V-1                                                  |
| Vector ID                          | 369328                                                  |
| Ident For Display                  | NSC: S743294 Endpt: LC50<br>Expld: AVGDATA hiConc: -4.0 |
| Parameters for Standard COMPARE    |                                                         |
| Target Set Name                    | STANDARD_AGENTS                                         |
| Target Set Endpoint                | LC50 – 50% cell kill                                    |
| Lookup Word                        | MJMLab                                                  |
| Minimum Correlation                | 0.2                                                     |
| Count Results to Return            | 50                                                      |
| Minimum Count<br>Common Cell Lines | 40                                                      |
| Minimum Standard<br>Deviation      | 0.05                                                    |

| Rank | Correlation | Target Vector ident                                     | Target Vector Descriptor |
|------|-------------|---------------------------------------------------------|--------------------------|
| 1    | 0.681       | NSC: S332598 Endpt: LC50<br>Expld: AVGDATA hiConc: -9.0 | rhizoxin                 |
| 2    | 0.65        | NSC: S332598 Endpt: LC50<br>Expld: AVGDATA hiConc: -4.0 | rhizoxin                 |
| 3    | 0.558       | NSC: S49842 Endpt: LC50<br>Expld: AVGDATA hiConc: -7.6  | vinblastine sulfate      |
| 4    | 0.545       | NSC: S71851 Endpt: LC50<br>Expld: AVGDATA hiConc: -2.3  | A-TGDR                   |
| 5    | 0.54        | NSC: S49842 Endpt: LC50<br>Expld: AVGDATA hiConc: -4.0  | vinblastine sulfate      |

### **In Vitro Tubulin Polymerization Assay**

Ice-cold assay buffer (39  $\mu$ L of 80 mM PIPES pH 6.9, 0.5 mM EGTA, 2 mM  $MgCl_2$ , 5% glycerol) was placed in a 384-well plate. Compound (1  $\mu$ L of 0.5 mM in DMSO) was added to achieve a final drug concentration of 10  $\mu$ M. Tubulin (10  $\mu$ L of 15 mg/mL in ice-cold 500 mM K-PIPES, 0.5 mM  $MgCl_2$ , pH 6.9 buffer) was added to each well. The plate was cooled on ice for 10 min and GTP (0.5  $\mu$ L from 100 mM) stock was added using an automated multichannel pipette followed by mixing three times (mix volume = 12  $\mu$ L). The plate was placed immediately in a Molecular Devices SpectraMax 384 plus plate reader pre-heated to 37  $^{\circ}C$  and the progress of polymerization monitored at 340 nm for 30 min. The microtubule stabilizer and destabilizer, paclitaxel and nocodazole respectively were used as controls at a final concentration of 10  $\mu$ M.

### **Cell Cycle Arrest**

HeLa cells were grown in RPMI-1640 media supplemented with 10% fetal bovine serum (Gemini Bioproducts) and 1% Pen-Strep antibiotic and incubated at 37  $^{\circ}C$  in a 5%  $CO_2$ , 95% humidity atmosphere. The HeLa cells ( $8 \times 10^5$  in 4 mL) were treated with 5  $\mu$ M compound (0.05% DMSO final) in 6-well plates for 18 h in replicates of three. The cells were harvested, fixed in 70% ice-cold ethanol for 1 h at  $-20^{\circ}C$ , rinsed with phosphate buffered saline (PBS pH 7.4) and RNase treated (50  $\mu$ L of 0.1 mg/mL RNase A in PBS) for 2 h and subsequently stained with propidium iodide (50  $\mu$ g/mL in PBS). The DNA content was measured using a Benton Dickinson LSR II cell flow cytometer with 20,000 events acquired per sample. The data was gated for single cells using propidium iodide-width vs. area as discriminators (see supporting information for raw data). Population distribution in the various phases of the cell cycle was determined using the software FCS Express version 3.

## Summary of Cell Cycle Analysis Results:

- 800,000 HeLa cells in 4mL treated with 5 $\mu$ M Compound (0.05% DMSO) in 6-well plates in triplicate for 18h.
- Cells were harvested, fixed in 70% ice-cold EtOH for 1hr, RNase (0.1mg/ml) treated for 2h and stained with propidium iodide (50  $\mu$ g/mL) and DNA content was measured by Cell flow cytometry with 20,000 events acquired per sample. The data was gated for single cells using PI-width vs. PI-Area.

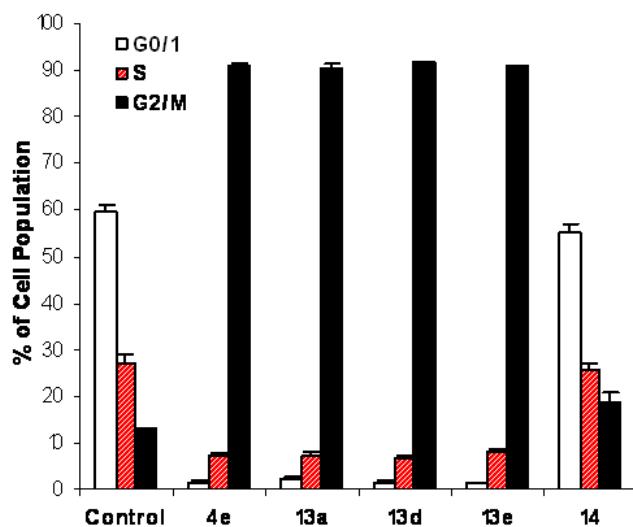

# Cell Cycle Analysis Results: Control

Replicate 1.

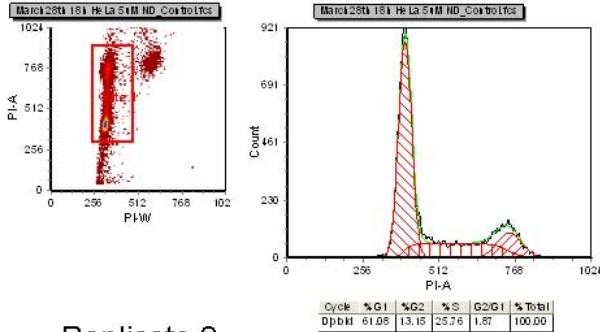

Replicate 3.

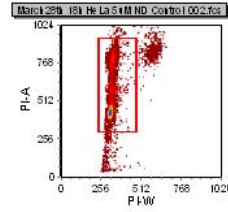

Replicate 2.

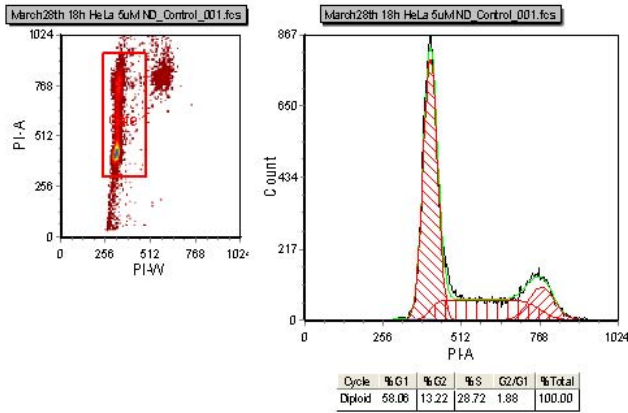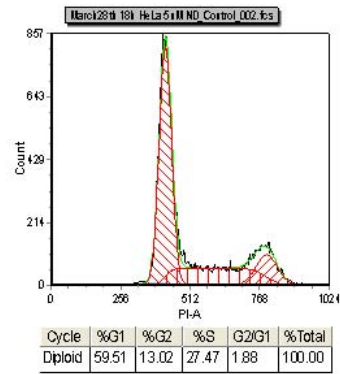

# Cell Cycle Analysis Results: 4e (ND-6732)

Replicate 1.

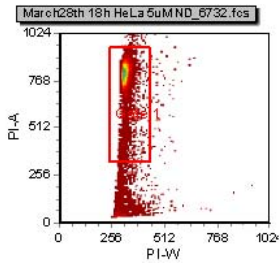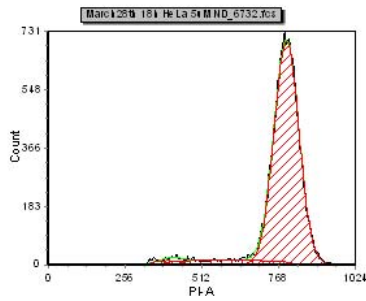

| Cycle   | %G1  | %G2   | %S   | G2/G1 | %Total |
|---------|------|-------|------|-------|--------|
| Diploid | 1.70 | 91.34 | 6.96 | 1.98  | 100.00 |

Replicate 2.

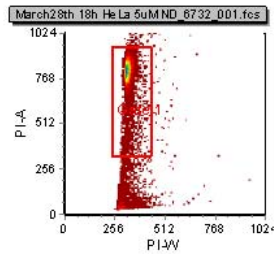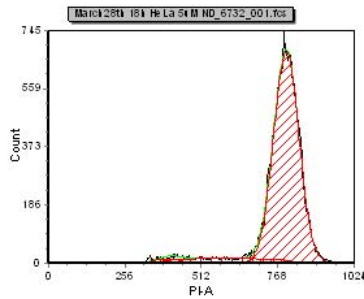

| Cycle   | %G1  | %G2   | %S   | G2/G1 | %Total |
|---------|------|-------|------|-------|--------|
| Diploid | 1.62 | 91.28 | 7.10 | 1.99  | 100.00 |

Replicate 3.

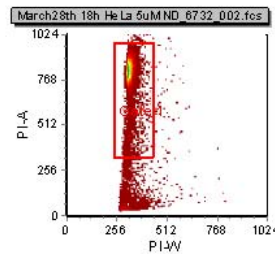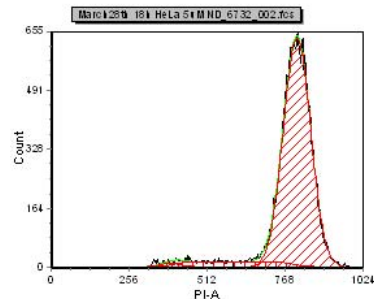

| Cycle   | %G1  | %G2   | %S   | G2/G1 | %Total |
|---------|------|-------|------|-------|--------|
| Diploid | 1.39 | 90.66 | 7.95 | 2.05  | 100.00 |

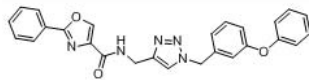



# Cell Cycle Analysis Results: **13a** (ND-8467)

Replicate 1.

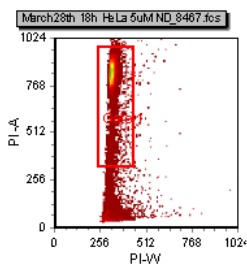

Replicate 2.

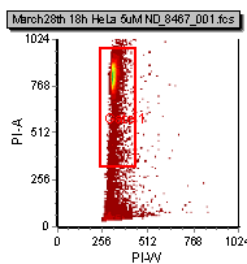

Replicate 3.

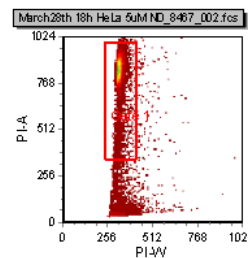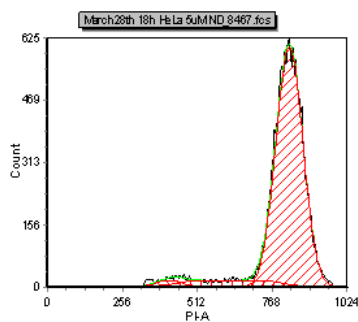

| Cycle   | %G1  | %G2   | %S   | G2/G1 | %Total |
|---------|------|-------|------|-------|--------|
| Diploid | 2.62 | 88.97 | 8.41 | 1.98  | 100.00 |

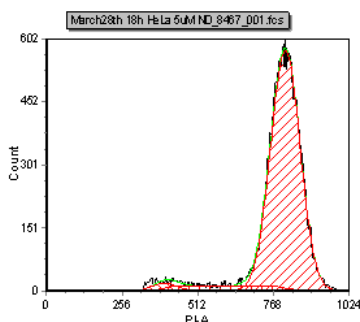

| Cycle   | %G1  | %G2   | %S   | G2/G1 | %Total |
|---------|------|-------|------|-------|--------|
| Diploid | 2.41 | 91.06 | 6.53 | 2.01  | 100.00 |

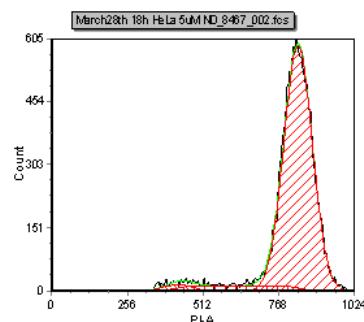

| Cycle   | %G1  | %G2   | %S   | G2/G1 | %Total |
|---------|------|-------|------|-------|--------|
| Diploid | 2.28 | 90.90 | 6.82 | 1.94  | 100.00 |

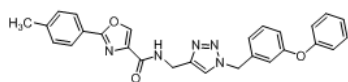

# Cell Cycle Analysis Results: 13d (ND-8505)

Replicate 1.

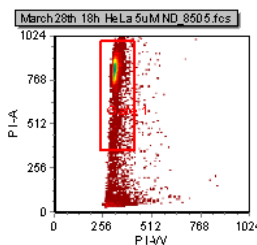

Replicate 2.

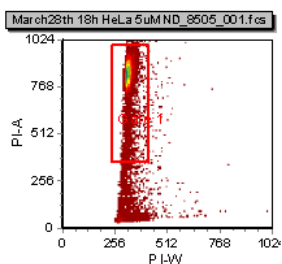

Replicate 3.

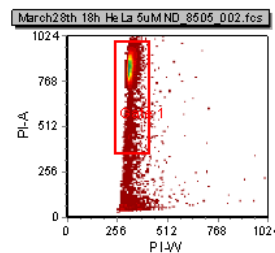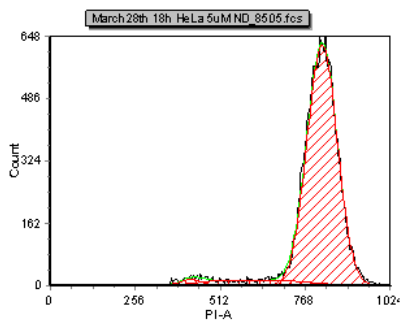

| Cycle   | %G1  | %G2   | %S   | G2/G1 | %Total |
|---------|------|-------|------|-------|--------|
| Diploid | 1.76 | 91.84 | 6.41 | 1.93  | 100.00 |

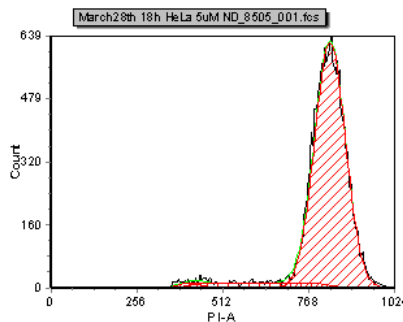

| Cycle   | %G1  | %G2   | %S   | G2/G1 | %Total |
|---------|------|-------|------|-------|--------|
| Diploid | 1.25 | 91.85 | 6.90 | 2.00  | 100.00 |

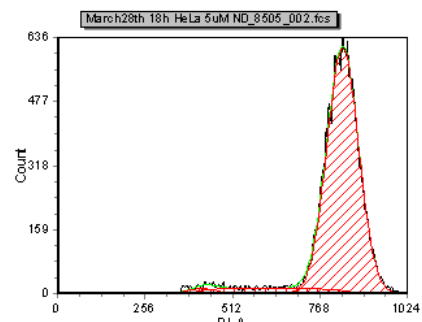

| Cycle   | %G1  | %G2   | %S   | G2/G1 | %Total |
|---------|------|-------|------|-------|--------|
| Diploid | 1.56 | 91.41 | 7.03 | 1.97  | 100.00 |

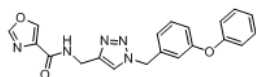

# Cell Cycle Analysis Results: 13e (ND-8504)

Replicate 1.

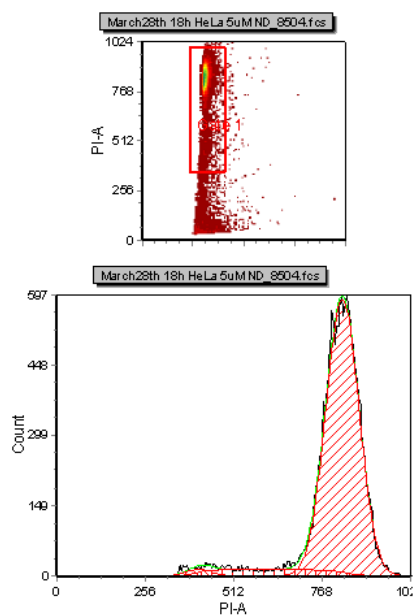

| Cycle   | %G1  | %G2   | %S   | G2/G1 | %Total |
|---------|------|-------|------|-------|--------|
| Diploid | 1.61 | 90.80 | 7.59 | 2.00  | 100.00 |

Replicate 2.

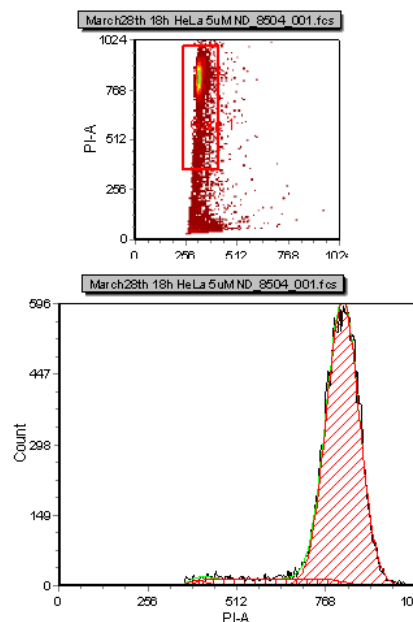

| Cycle   | %G1  | %G2   | %S   | G2/G1 | %Total |
|---------|------|-------|------|-------|--------|
| Diploid | 0.86 | 90.89 | 8.25 | 2.03  | 100.00 |

Replicate 3.

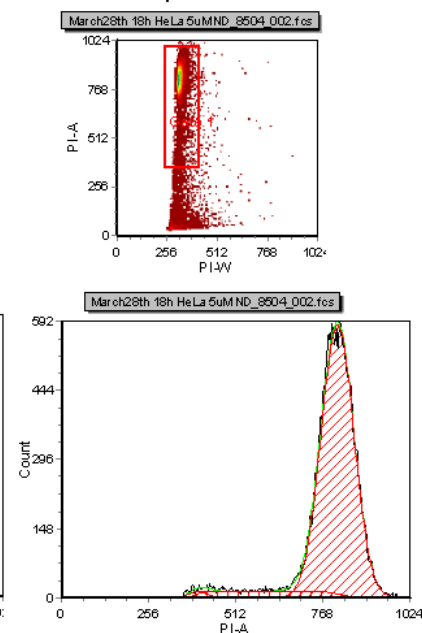

| Cycle   | %G1  | %G2   | %S   | G2/G1 | %Total |
|---------|------|-------|------|-------|--------|
| Diploid | 1.10 | 90.72 | 8.19 | 2.01  | 100.00 |

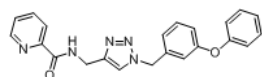

# Cell Cycle Analysis Results: 14 (ND-8492)

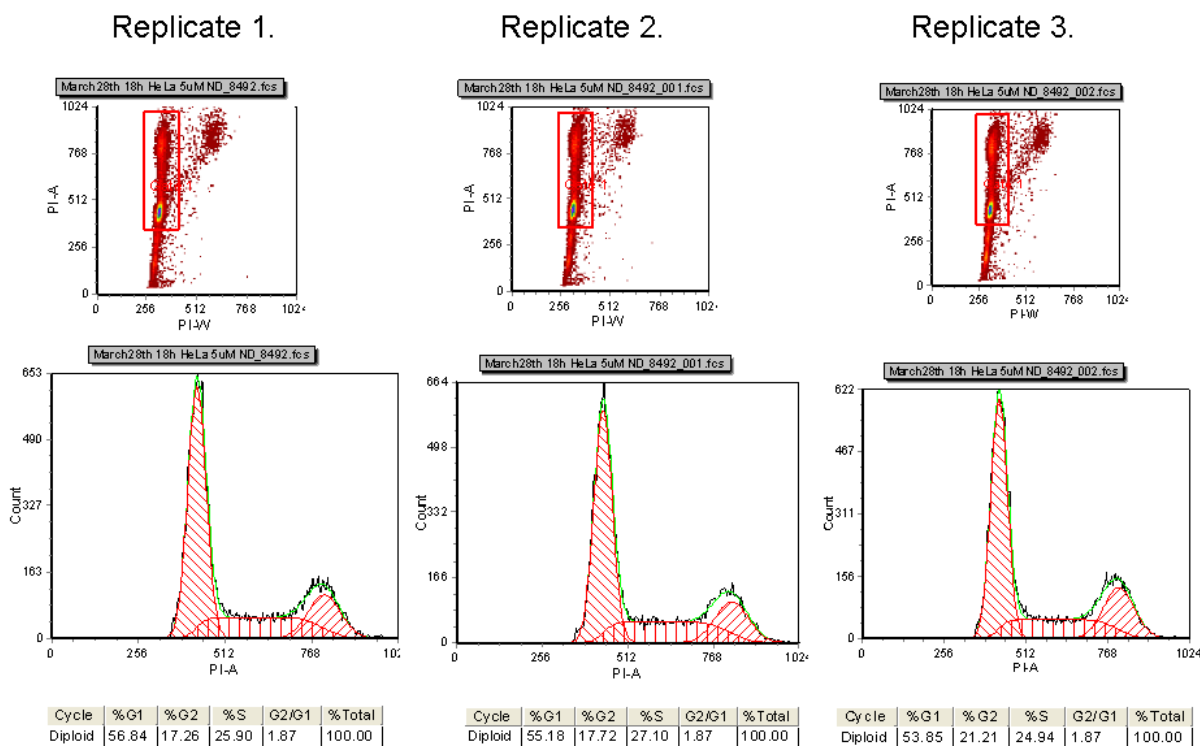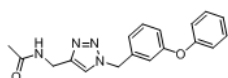

## Confocal Microscopy

HeLa cells were grown in RPMI-1640 media supplemented with 10% fetal bovine serum (Gemini Bioproducts) and 1% Pen-Strep antibiotic and incubated at 37 °C in a 5% CO<sub>2</sub>, 95% humidity atmosphere. The HeLa cells (2.5 x 10<sup>6</sup> cells/mL) were placed on 22 mm Corning type 1 square cover slips and incubated for 3 h to allow the cells to attach. The cells were then incubated for 18 h in media containing DMSO vehicle or 5 μM compound (0.05% DMSO final). The media was aspirated and cells treated with microtubule stabilizing buffer (MTSB: 80 mM PIPES pH 6.8, 1 mM MgCl<sub>2</sub>, 1 mM EGTA) for 30 seconds after which glutaraldehyde was added to 0.5% final and the cells fixed for 10 min. Excess glutaraldehyde was quenched by treating the samples twice with a freshly made solution of NaBH<sub>4</sub> (1 mg/mL in PBS) for 5 min. The samples were rinsed with PBS and blocked for 10 min with antibody diluting solution (PBS pH 7.4, 0.2% Triton X-100, 2% BSA, 0.1% sodium azide). Monoclonal anti-α-tubulin mouse FITC conjugated antibody (1:50 dilution) in antibody diluting solution containing 0.5 mg/mL RNase A (Qiagen) was added and the samples incubated for 2.5 hrs and then treated for 15 min

with propidium iodide (50  $\mu\text{g}/\text{mL}$  in antibody diluting solution). The samples were washed four times (5 min each) with PBS containing 0.1% Triton X-100, drained, mounted onto microscope slides using 10  $\mu\text{L}$  of vectashield (Vector Technologies) mounting media. The cover slips were sealed and the samples visualized immediately on a Zeiss confocal LSM510 microscope.
